# Supplementary material for: Distribution-free tests of independence in high dimensions
Source: Oxford University Press journal article supplement (doi:10.1093/biomet/asx050), 2017-08-30
Supplement: asx050_tautest_sup-r3.pdf [file asx050_tautest_sup-r3.pdf]

## Supplementary Material for Distribution-Free Tests of Independence in High Dimensions

BY FANG HAN

*Department of Statistics, University of Washington, Box 354322, Seattle, Washington 98195,  
 U.S.A.*

fanghan@uw.edu

SHIZHE CHEN

*Department of Statistics, Columbia University, Room 1005 SSW, MC 4690, 1255 Amsterdam  
 Avenue, New York, New York 10027, U.S.A.*

shizhe.chen@gmail.com

AND HAN LIU

*Department of Operations Research and Financial Engineering, Princeton University, Sherrerd  
 Hall, Charlton Street, Princeton, New Jersey 08544, U.S.A.*

hanliu@princeton.edu

### A. ADDITIONAL RESULTS

#### A.1. Overview

The theory in the main paper employs techniques that can be easily generalized to other problems such as structural testings. In this section, we discuss three additional results that are of interest. In particular, Section A.2 studies the approximation of the exact distributions of the test statistics proposed in the main paper, and we consider the problems of testing  $m$ -dependence and homogeneity in Sections A.3 and A.4.

#### A.2. Approximation to the exact distributions

Theorems 1 and 2 in the main paper show that the proposed test statistics  $L_n$  and  $\tilde{L}_n$  converge weakly to a Gumbel distribution. The next theorem characterizes the convergence rates for  $L_n$  and  $\tilde{L}_n$ .

**THEOREM A1.** *For all rank-type  $U$ -statistics, under the conditions in Theorem 2 and that  $\log d = o(n^{1/3})$ , we have*

$$\left| \Pr\left(\frac{n\tilde{L}_n^2}{\sigma_U^2} - 4 \log d + \log \log d \leq y\right) - \exp\left\{- (8\pi)^{-1/2} \exp\left(-\frac{y}{2}\right)\right\} \right| = O_y\left\{\frac{(\log d)^{3/2}}{n^{1/2}} + \frac{1}{(\log d)^{3/2}}\right\}.$$

*For all simple linear rank statistics, if conditions in Theorem 1 hold and  $\log d = O(n^{1/3-\epsilon})$  for some constant  $\epsilon \in (0, 1/3)$ , we have*

$$\begin{aligned} & \left| \Pr\left(\frac{nL_n^2}{\sigma_V^2} - 4 \log d + \log \log d \leq y\right) - \exp\left\{- (8\pi)^{-1/2} \exp\left(-\frac{y}{2}\right)\right\} \right| \\ &= O_y\left\{\frac{(\log d)^{3/2}}{n^{1/2}} + \frac{1}{(\log d)^{3/2}} + \frac{(\log d)^{1/2}}{n^{1/6}}\right\}. \end{aligned}$$

Theorem A1 shows two points. (i) When  $\log d \asymp n^\kappa$  for some  $\kappa < 1/3$ , the proposed tests based on simple linear rank statistics and rank-type  $U$ -statistics achieve polynomial rates of convergence. Compared to tests based on the rank-type  $U$ -statistics, the tests based on simple linear rank statistics lose an extra

$O\{(\log d)^{1/2}n^{-1/6}\}$  term in the rate of convergence, due to approximating the population ranks using the empirical ranks. Check the proof of moderate deviation in Lemma C5 for more details. (ii) When  $d \asymp n^C$  for some  $C \in (0, \infty)$ , Theorem A1 only guarantees an  $O\{(\log n)^{-3/2}\}$  rate of convergence.

We will show that the convergence rate can be accelerated by approximating the exact distributions of the test statistics. Under  $H_0$  in the main paper,  $\{V_{jk}, j < k\}$  and  $\{U_{jk}, j < k\}$  are independent and only depend on the relative ranks  $\{R_{ni}^{jk}, i = 1, \dots, n, j < k\}$ , which are uniformly distributed under permutations on  $\{1, \dots, n\}$ . Therefore, we can conduct simulations to approximate the exact distributions of  $\{V_{jk}, j < k\}$  and  $\{U_{jk}, j < k\}$ , respectively.

Specifically, for  $i = 1, \dots, M$ , we generate  $X_{\cdot, i}^{(i)} \in \mathcal{R}^{n \times d}$  as an  $n \times d$  matrix with all entries independently drawn from a standard normal distribution, which yield simple linear rank statistics  $\{V_{jk}^{(i)}, j < k\}$  and the rank-type  $U$ -statistics  $\{U_{jk}^{(i)}, j < k\}$ . Next, we calculate the values of  $n(L_n^{(i)})^2/\sigma_V^2 - 4 \log d + \log \log d$  and  $n(\tilde{L}_n^{(i)})^2/\sigma_U^2 - 4 \log d + \log \log d$ . Here  $L_n^{(i)}$  and  $\tilde{L}_n^{(i)}$  are the extreme-value statistics based on  $\{V_{jk}^{(i)}, j < k\}$  and  $\{U_{jk}^{(i)}, j < k\}$ , respectively. Let  $\hat{F}_{n,d;M}^V(\cdot)$  and  $\hat{F}_{n,d;M}^U(\cdot)$  be the empirical distributions, and let  $F_{n,d}^V(\cdot)$  and  $F_{n,d}^U(\cdot)$  be their population counterparts.

The Dvoretzky-Kiefer-Wolfowitz inequality (Dvoretzky et al., 1956; Massart, 1990) guarantees, for each pair of  $(n, d)$ ,

$$\begin{aligned} \text{pr} \left\{ \sup_{x \in \mathcal{R}} |\hat{F}_{n,d;M}^V(x) - F_{n,d}^V(x)| > \left( \frac{\log M}{M} \right)^{1/2} \right\} &\leq \frac{2}{M^2}, \\ \text{pr} \left\{ \sup_{x \in \mathcal{R}} |\hat{F}_{n,d;M}^U(x) - F_{n,d}^U(x)| > \left( \frac{\log M}{M} \right)^{1/2} \right\} &\leq \frac{2}{M^2}. \end{aligned} \quad (\text{A1})$$

We replace  $q_\alpha$  in (8) using  $\hat{q}_{\alpha;n,d}^V$  and  $\hat{q}_{\alpha;n,d}^U$ , which are the  $1 - \alpha$  quantiles of  $\hat{F}_{n,d;M}^V(\cdot)$  and  $\hat{F}_{n,d;M}^U(\cdot)$

$$\hat{q}_{\alpha;n,d}^V \equiv \inf\{x : \hat{F}_{n,d;M}^V(x) \geq 1 - \alpha\}, \quad \hat{q}_{\alpha;n,d}^U \equiv \inf\{x : \hat{F}_{n,d;M}^U(x) \geq 1 - \alpha\}.$$

We refer to the tests using the simulation-based thresholds  $\hat{q}_{\alpha;n,d}^V$  and  $\hat{q}_{\alpha;n,d}^U$  as the exact tests.

Using (A1), we have the next theorem that guarantees the asymptotic control of sizes.

**THEOREM A2.** *Under  $H_0$ , simple linear rank statistics satisfy that, for each pair of  $(n, d)$ , with probability no smaller than  $1 - 2/M^2$ , we have*

$$\sup_{\alpha \in [0,1]} \left| \text{pr} \left( \frac{nL_n^2}{\sigma_V^2} - 4 \log d + \log \log d \geq \hat{q}_{\alpha;n,d}^V \mid \{X_{\cdot, i}^{(i)}\}_{i=1}^M \right) - \{1 - \hat{F}_{n,d;M}^U(\hat{q}_{\alpha;n,d}^V)\} \right| \leq \left( \frac{\log M}{M} \right)^{1/2}.$$

The same inequality also applies to the rank-type  $U$ -statistics. Moreover, as  $n$  and  $d$  grow,  $\hat{q}_{\alpha;n,d}^V$  and  $\hat{q}_{\alpha;n,d}^U$  are both consistent estimators of  $q_\alpha$  in (9) as  $M = M_n$  grows with  $n$ .

Theorem A2 shows that, with high probability, we can have arbitrarily fast convergence rates to the above intermediate approximation by setting the number of simulations  $M$  large enough. Typically, it is much faster than the rate  $O\{(\log n)^{5/2}/n^{1/2}\}$  derived in Liu et al. (2008). On the other hand, to attain this arbitrarily fast rate of convergence, we need to conduct  $M$  simulations for estimating the threshold value. This increases the computational burden compared to the tests in (8). For the test of  $m$ -dependence, which we shall introduce in Section A.3, it is impossible to simulate the null exact distribution and we stick to the test in (A2).

### A.3. Test of $m$ -dependence

A random vector  $X = (X_1, \dots, X_d)^T \in \mathcal{R}^d$  follows a Gaussian copula distribution if and only if  $\{F_1(X_1), F_2(X_2), \dots, F_d(X_d)\}^T$  distributes the same as  $\{\Phi(Z_1), \dots, \Phi(Z_d)\}^T$ , where  $F_1, \dots, F_d$  are the marginal distribution functions of  $X_1, \dots, X_d$ ,  $\Phi(\cdot)$  represents the distribution function of the standard Gaussian, and  $Z = (Z_1, \dots, Z_d)^T \sim N_d(0, \Sigma^0)$  with diagonal entries of  $\Sigma^0$  equal 1. The Gaussian copula family includes the Gaussian, and is a semi-parametric one since the marginal distributions of

$X$  are unspecified. We refer to  $\Sigma^0$  as the latent correlation matrix of  $X$ . As in the main paper, we only consider continuous  $X$  for avoiding possible ties. 70

We aim at testing the null hypothesis  $A_0 : \Sigma_{jk}^0 = 0$ , for all  $|j - k| \geq m$ . Because  $X$  is assumed to be a Gaussian copula, the dependence structure among  $\{X_1, \dots, X_d\}$  is fully encoded in  $\Sigma^0$ . Therefore, testing  $A_0$  is equivalent to testing  $m$ -dependence among entries of  $X$ , i.e.,  $X_j$  is independent of  $X_k$ , for all  $|j - k| \geq m$ . 75

Cai & Jiang (2011) first consider the problem of testing  $A_0$  in high dimensions on Gaussian data. Later, the result is extended to non-Gaussian data under a moment assumption (Shao & Zhou, 2014). In this section, we show that the moment assumption can be utterly relaxed by resorting to the rank-based statistics.

For testing  $A_0$ , instead of resorting to the Pearson's correlation coefficients as in Cai & Jiang (2011) and Shao & Zhou (2014), we use Kendall's tau correlation coefficients  $\{\tau_{jk}, 1 \leq j < k \leq d\}$  introduced in Example 2 in the main paper. It is well known that Kendall's tau is irrelevant to the marginal distributions of  $X$  (Nelsen, 1999). Accordingly, within the Gaussian copula family, Kendall's tau is a more natural measure of dependence than Pearson's correlation coefficient. Moreover, it is known from Lemma C8 that, under the Gaussian copula family, we have  $\Sigma_{jk}^0 = \sin(\tau_{jk}^0 \pi/2)$ , where  $\tau_{jk}^0 \equiv E(\tau_{jk})$ . Therefore, within the Gaussian copula family, testing  $A_0$  is equivalent to testing  $\tau_{jk}^0 = 0$  for all  $|j - k| \geq m$ . We hence propose the following test statistic 80

$$T_{\alpha,m}^\tau \equiv I \left\{ \frac{9n}{4} (L_{n,m}^\tau)^2 - 4 \log d + \log \log d \geq q_\alpha \right\}, \quad (\text{A2})$$

where  $q_\alpha$  is introduced in (9) in the main paper and the extreme-value statistic  $L_{n,m}^\tau \equiv \max_{|j-k| \geq m} |\tau_{jk}|$ .  $L_{n,m}^\tau$  is an extreme-value statistic similar to  $L_n^\tau$  in the main paper. We expect  $L_{n,m}^\tau$  to have similar null limiting distribution as  $L_n^\tau$  given proper conditions on  $m$ . We reject  $A_0$  if and only if  $T_{\alpha,m}^\tau = 1$ . 85

The following theorem justifies the test  $T_{\alpha,m}^\tau$  for a fixed nominal significance level  $\alpha$ .

**THEOREM A3.** *Suppose that  $\log d = o(n^{1/3})$  as  $n$  grows,  $m = o(d^c)$  for any  $c > 0$ , and for some constant  $\delta \in (0, 1)$ ,*

$$\text{card}[\{1 \leq j \leq d : |\Sigma_{jk}^0| > 1 - \delta \text{ for some } 1 \leq k \leq d \text{ and } j \neq k\}] = o(d).$$

*Provided that  $X$  is continuous and distributes as a Gaussian copula, under  $A_0$ , we have, for any  $y \in \mathcal{R}$ ,*

$$\left| \text{pr} \left\{ \frac{9n}{4} (L_{n,m}^\tau)^2 - 4 \log d + \log \log d \leq y \right\} - \exp \left\{ -(8\pi)^{-1/2} \exp \left( -\frac{y}{2} \right) \right\} \right| = o_y(1).$$

*Accordingly, the test  $T_{\alpha,m}^\tau$  can asymptotically control the size as  $n$  and  $d$  grow, i.e.,*

$$\text{pr}(T_{\alpha,m}^\tau = 1 \mid A_0) = \alpha + o(1).$$

*Remark A1.* The proof of the theorem shows that the assumption,  $m = o(d^c)$  for any  $c > 0$ , can be easily relaxed. Specifically, we only require  $m = o(d^{\epsilon(\delta)})$  for a small enough constant  $\epsilon(\delta)$  depending on  $\delta$ . This can be verified by checking Equation (C19), and Equation (68) in Cai & Jiang (2011). 95

Similar to the power analysis in Section 4.2 in the main paper, we study the power of the test  $T_{\alpha,m}^\tau$  against a sparse alternative. To this end, consider the following set of matrices

$$\mathcal{U}_m(c) \equiv \left\{ M \in \mathcal{R}^{d \times d} : \text{diag}(M) = I_d, M = M^\top, \max_{|j-k| \geq m} |M_{jk}| \geq c(\log d/n)^{1/2} \right\}.$$

The following theorem shows, for the Gaussian copula family, as long as the latent correlation matrix  $\Sigma^0 \in \mathcal{U}_m(C)$  for some large constant  $C$ , the power of the proposed test tends to one. 100

**THEOREM A4.** *Suppose that we observe  $n$  independent observations of a  $d$ -dimensional random vector  $X = (X_1, \dots, X_d)^\top$  following a Gaussian copula with the latent correlation matrix  $\Sigma^0$ . Then, there*

exists some large constant  $D_3$  such that

$$\sup_{\Sigma^0 \in \mathcal{U}_m(D_3)} \text{pr}(T_{\alpha,m}^\tau = 1) = 1 - o(1),$$

105 as  $n$  and  $d$  grow. Here the supremum is taken over the Gaussian copula family such that  $\Sigma^0 \in \mathcal{U}_m(D_3)$ .

We derive Theorem A4 using a similar technique as in the proof of Theorem 3. The proof is thus omitted.

We then turn to study the optimality of  $T_{\alpha,m}^\tau$ . In testing  $A_0$ , for each  $n$ , we define  $\mathcal{T}_{\alpha,m}$  to be the set of all measurable size- $\alpha$  tests  $T_{\alpha,m}$  such that  $\text{pr}(T_{\alpha,m} = 1 \mid A_0) \leq \alpha$ . The following theorem gives the detection lower bound in differentiating the null hypothesis and the sparse alternative.

110 **THEOREM A5.** *Assume that there exists a positive constant  $c'_0 < 1$ ,  $\log d = o(n)$  as  $n$  grows, and  $m = o(d^c)$  for any  $c > 0$ . Let  $\beta$  be a positive constant satisfying that  $\alpha + \beta < 1$ . For all large enough  $n$  and  $d$ , we have*

$$\inf_{T_{\alpha,m} \in \mathcal{T}_{\alpha,m}} \sup_{\Sigma^0 \in \mathcal{U}_m(c'_0)} \text{pr}(T_{\alpha,m} = 0) \geq 1 - \alpha - \beta,$$

where the supremum is taken over any distribution family such that  $\Sigma^0 \in \mathcal{U}_m(c'_0)$ .

Therefore, we conclude that  $T_{\alpha,m}^\tau$  is rate-optimal in testing the null hypothesis  $A_0$  against the sparse  
115 alternative in the main paper.

For any constant  $c > 0$ , the matrix set  $\mathcal{U}(c)$  defined in (13) in the main paper includes  $\mathcal{U}_m(c)$ . Accordingly, the lower bound derived in Section 4.3 cannot be trivially exploited to derive the lower bound for testing the bandedness of  $\Sigma^0$ . However, using the fact that  $m = o(d^c)$  for any  $c > 0$ , we can find the lower bound for testing  $A_0$  via designing a similar set of parameters as in the proof of Theorem 5.

#### 120 A.4. Test of homogeneity

Let  $X_{1,\cdot}, \dots, X_{n,\cdot} \in \mathcal{R}^d$  be  $n$  independent but not necessarily identically distributed random vectors with  $X_{i,\cdot} = (X_{i,1}, \dots, X_{i,d})^\top$  for  $i = 1, \dots, n$ . We aim at testing  $B_0 : X_{1,\cdot}, \dots, X_{n,\cdot}$  are identically distributed. Testing  $B_0$  is of fundamental interest in many statistical fields.

125 It is generally very complicated to test homogeneity in high dimensions. The works in this field are very limited and most of the existed ones reduce it to equity tests of two-sample means and covariance matrices. Bai & Saranadasa (1996), Srivastava & Du (2008), Chen & Qin (2010), and Cai et al. (2014) consider comparing the means of two high-dimensional Gaussian vectors with unknown covariance matrices, and Chen et al. (2010) and Cai et al. (2014) develop tests of equity of two covariance matrices.

We consider a simplified version of  $B_0$ : the entries in each  $X_{i,\cdot}$  are mutually independent. In this  
130 simplified setting, we reduce the test of  $B_0$  to the test that  $X_{1,j}, X_{2,j}, \dots, X_{n,j}$  are identically distributed for any  $j \in \{1, \dots, d\}$ . For each  $j$ , we test the homogeneity using a rank-based test statistic. We then formulate an extreme-value statistic by combining the  $d$  separate rank-based test statistics.

In details, let  $H_n$  be an extreme-value statistic summarizing the  $d$  separate rank-based test statistics:  $H_n \equiv \max_{j \in \{1, \dots, d\}} |h_j|$ , where

$$h_j \equiv \frac{2}{n(n-1)} \sum_{i < i'} \text{sign}(X_{i',j} - X_{i,j}) \quad (j = 1, \dots, d).$$

135 Here  $h_j$  is a rank-based statistic counting the number of inequalities  $X_{i',j} > X_{i,j}$  across all pairs  $i < i'$ . Mann (1945) is the first to introduce the test statistic  $h_j$  for testing homogeneity. Mann (1945) characterizes the sufficient conditions for  $h_j$  to be consistent and unbiased, and shows that this statistic is powerful against a trend alternative that will be introduced later. We refer to Kendall & Stuart (1961) for more discussion on the rationale of using  $h_j$  for testing homogeneity. For testing  $B_0$ , we propose the following  
140 statistic based on  $H_n$ :

$$T_\alpha^h \equiv I\left(\frac{9n}{4} H_n^2 - 2 \log d + \log \log d \geq \tilde{q}_\alpha\right),$$

where  $\tilde{q}_\alpha \equiv -\log \pi - 2 \log \log(1 - \alpha)^{-1}$  is the  $1 - \alpha$  quantile of the Gumbel distribution with the distribution function  $\exp\{-\pi^{-1/2} \exp(-y/2)\}$ .

Next, we justify that the test  $T_\alpha^h$  controls the size properly. Under  $B_0$ , we have  $X_{1,j}, \dots, X_{n,j}$  are identically distributed and hence the distribution of  $\text{sign}(X_{i',j} - X_{i,j})$  should be centered around zero, and the ranks of  $X_{1,j}, \dots, X_{n,j}$  are uniformly sampled from the set of all permutations of  $\{1, \dots, n\}$ . Accordingly,  $h_j$  is identically distributed to Kendall's tau statistic under  $H_0$  in the main paper. Therefore, using Example 2, we derive  $E_{B_0}(h_j) = 0$  and

$$\text{var}_{B_0}(h_j) = \frac{2(2n+5)}{9n(n-1)} = \frac{4}{9n} \{1 + o(1)\},$$

and the limiting distribution of  $H_n$  shall resemble that of Kendall's tau. Specifically, the following theorem provides the null limiting distribution of  $H_n$ .

**THEOREM A6.** *Suppose that  $\log d = o(n^{1/3})$  as  $n$  grows. Under  $B_0$ , we have, for any  $y \in \mathcal{R}$ ,*

145

$$\left| \text{pr} \left( \frac{9n}{4} H_n^2 - 2 \log d + \log \log d \right) - \exp \left\{ -\pi^{-1/2} \exp \left( -\frac{y}{2} \right) \right\} \right| = o_y(1).$$

Accordingly, the test  $T_\alpha^h$  can asymptotically control the size as  $n$  and  $d$  grow, i.e.,

$$\text{pr}(T_\alpha^h = 1 \mid B_0) = \alpha + o(1).$$

It is worth noting that, similar to Corollary 1 in the main paper, Theorem A6 holds without any distributional assumption on  $X_{1,\cdot}, \dots, X_{n,\cdot}$ .

We then study the power of the proposed test. We consider a particular trend alternative; that is, for at least one entry  $j \in \{1, \dots, d\}$ , the mean of  $X_{i,j}$  is a linear function of  $i$  for a certain entry  $j \in \{1, \dots, d\}$ , i.e.,  $B_1$ : there exists some  $j \in \{1, \dots, d\}$  such that  $E(X_{i,j}) = \beta_0 + \beta_1 i/n$  with  $\text{var}(X_{i,j}) = \sigma^2$ , for  $i = 1, \dots, n$  and  $\beta_0, \beta_1, \sigma^2 \in \mathcal{R}$ . Under  $B_1$ , the variance  $\sigma^2$  is identical across samples while the means are monotonically increasing or decreasing with respect to the label  $i$ . Such an alternative is of interest in areas including quality control, finance, and longitudinal data analysis. For instance, in quality control we are interested in inspecting whether machines keep performing well. One alternative of interest is: at least one machine's performance keeps descending.

150

155

Under  $B_1$ , consider the following set of real numbers  $(a_1, a_2)$ :

$$\mathcal{B}(c) \equiv \left\{ (a_1, a_2) : |a_1|/a_2 \geq c(\log d/n)^{1/2}, a_2 > 0 \right\}.$$

The following theorem shows that, uniformly over the alternative hypothesis set  $\mathcal{B}(C)$ , for some large enough constant  $C > 0$ , the power of the proposed test tends to unity as  $n$  grows.

**THEOREM A7.** *Suppose that there exists at least one entry  $j \in \{1, \dots, d\}$  satisfying  $B_1$  with parameters of interest  $(\beta_1, \sigma)$ . Moreover, for  $i = 1, \dots, n$ , the density function  $p_{ij}(\cdot)$  of  $\{X_{i,j} - E(X_{i,j})\}/\{\text{var}(X_{i,j})\}^{1/2}$  is identical to some density function  $p(\cdot)$ , which satisfies that*

160

$$p(x) \geq D_4 > 0 \text{ for all } x \in [-M, M], \quad (\text{A3})$$

for some constant  $M > 0$ . Then there exists some large scalar  $D_5$  only depending on  $D_4$  and  $M$  such that

$$\sup_{(\beta_1, \sigma) \in \mathcal{B}(D_5)} \text{pr}(T_\alpha^h = 0) = o(1).$$

In the following we show that the detection boundary  $|\beta_1|/\sigma \geq C(\log d/n)^{1/2}$  is rate-optimal. We define  $\mathcal{T}_\alpha^h$  to be the set of all measurable size- $\alpha$  tests  $T_\alpha^h$  satisfying

165

$$\text{pr}(T_\alpha^h = 1 \mid B_0) \leq \alpha.$$

The following theorem shows that the proposed test is rate-optimal against the trend alternative  $B_1$ .

THEOREM A8. Assume that there exists a constant  $c'_0 < 3^{1/2}$ ,  $\log d/n = o(1)$  as  $n$  grows. Let  $\beta$  be a positive constant satisfying that  $\alpha + \beta < 1$ . For all large enough  $n, d$ , we have

$$\inf_{T_\alpha^h \in \mathcal{T}_\alpha^h} \sup_{(\beta_1, \sigma) \in \mathcal{B}(c'_0)} \text{pr}(T_\alpha^h = 0) \geq 1 - \alpha - \beta,$$

170 where  $\mathcal{T}_\alpha^h$  represents the family of measurable size- $\alpha$  tests under  $B_0$ , and the supremum is taken over any distribution family of  $X_{1,\dots}, X_{n,\dots}$  satisfying  $B_1$ .

It is straightforward that, when  $X_{1,\dots}, X_{n,\dots}$  are normally distributed, Equation (A3) in Theorem A7 is satisfied. Accordingly, combining Theorems A6, A7, and A8 concludes that  $T_\alpha^h$  is rate-optimal in testing the null hypothesis  $B_0$  against the trend alternative  $B_1$ .

175

## B. ADDITIONAL NUMERICAL EXPERIMENTS

### B.1. Overview

In this section, we conduct additional numerical experiments to further explore the properties of our proposals. In Section B.2, we provide details of the data generating mechanism in Section 5.2 in the main paper. In Section B.3, we compare our tests to recent proposals by Mao (2016) and Leung & Drton (2017).  
180 In Section B.4, we investigate the performance of the approximation proposal in Section A.2. And finally, we apply our proposals on a real data set in Section B.5.

### B.2. Data generating mechanism

We now explain in detail the null distributions and alternative distributions used in Section 5.2 in the main paper.

185 For the Gaussian distribution, we generate data from  $X \sim N_d(0, I_d)$  under the null, and  $X \sim N_d(0, R^*)$  under the sparse alternative. Here  $R^*$  is generated as follows: consider a random matrix  $\Delta \in \mathcal{R}^{d \times d}$  with eight nonzero entries. We select the locations of four nonzero entries randomly from the upper triangle of  $\Delta$ , each with a magnitude randomly drawn from the uniform distribution in  $[0, 1]$ . The other four nonzero entries in the lower triangle are determined by symmetry. Finally, to ensure positivity,  
190  $R^* \equiv I_d + \Delta + \delta I_d$ , where  $\delta = \{-\lambda_{\min}(I_d + \Delta) + 0.05\} I\{\lambda_{\min}(I_d + \Delta) \leq 0\}$ .

For the light-tailed Gaussian copula, we draw data as  $X_j = Z_j^{1/3}$  for  $j = 1, \dots, d$  in both the null and alternative distributions. Under the null,  $Z = (Z_1, \dots, Z_d)^T \sim N_d(0, I_d)$ , and under the alternative,  $Z = (Z_1, \dots, Z_d)^T \sim N_d(0, R^*)$ .

195 For the heavy-tailed Gaussian copula, we draw data as  $X_j = Z_j^3$  for  $j = 1, \dots, d$ . Under the null,  $Z = (Z_1, \dots, Z_d)^T \sim N_d(0, I_d)$ , and under the alternative,  $Z = (Z_1, \dots, Z_d)^T \sim N_d(0, R^*)$ .

For the multivariate  $t$  distribution, we generate  $X_1, \dots, X_d$  independently from a univariate  $t$  distribution with degree of freedom three under the null distribution, and we generate data from a multivariate  $t$  distribution with the covariance matrix  $R^*$  and degree of freedom three under the alternative distribution.

200 For the multivariate exponential distribution, we draw  $X_j, j = 1, \dots, d$  from independent exponential distributions of rate  $0.25$  under the null distribution, and from a multivariate distribution, where, for each  $j = 1, \dots, d$ ,  $X_j$  conditioned on  $X_{-j}$  follows an exponential distribution of rate  $0.25 + R_{j,-j}^* X_{-j}$ . Here  $R_{j,-j}^*$  denotes the  $j$ th row of  $R$  without the diagonal element, and  $X_{-j}$  denotes the vector  $X$  without the  $j$ th entry.

### B.3. Additional comparisons

205 Mao (2016) and Leung & Drton (2017) study the problem of testing  $H_0$  using statistics based on the sums of rank correlations. Mao (2016) proposes a test based on Spearman's rho statistics

$$S = \sigma_{nd}^{-1} \left\{ \sum_{j=2}^d \sum_{k=1}^{j-1} \rho_{jk}^2 - \frac{d(d-1)}{2(n-1)} \right\}, \quad (\text{B1})$$

where  $\sigma_{nd}^2 \equiv \{d(d-1)(25n^3 - 57n^2 - 40n + 108)\} / \{25(n-1)^3 n(n+1)\}$ . Mao (2016) shows that  $S$  converges in distribution to the standard normal as  $n$  and  $d$  grow. Leung & Drton (2017) study a similar statistics

$$T = \frac{n}{d} \left\{ \sum_{j=2}^d \sum_{k=1}^{j-1} \rho_{jk}^2 - \frac{d(d-1)}{2(n-1)} \right\}, \quad (\text{B2})$$

and show that  $T$  converges in distribution to the standard normal as  $n$  and  $d$  grow. The difference is that Mao (2016) uses the exact standard deviation  $\sigma_{nd}$ , while Leung & Drton (2017) use  $d/n$  as an approximation. Leung & Drton (2017) also provide a general theory that applies to other  $U$ -statistics. 210

In this simulation, we compare three tests based on Spearman's rho, i.e., the Spearman test in the main paper, the test based on  $S$  of Mao (2016), and the test based on  $T$  of Leung & Drton (2017).

We apply the three tests on the ten data generating mechanisms described in Section B.2. In addition, we adopt a simulation scheme where data are drawn from independent Cauchy distribution with mean zero and scale one as in Mao (2016) to examine the sizes of the three tests under infinite variance. 215

Results averaged over 5,000 simulated data sets are shown in Table 1. The two tests of Mao (2016) and Leung & Drton (2017) have comparable performances across all settings, which agrees with the findings in Mao (2016). We note that the Spearman test achieves higher power against the sparse alternative than the other two tests. This is because our proposed test is based on the maxima while the other two tests are based on averages, and thus our proposed test is more sensitive to the sparse alternatives. We also note that our proposed test can sometimes be conservative, which is a result of the slow convergence rate of the Gumbel distribution. As we will see in Section B.4, this can be addressed by resorting to the simulation-based rejection threshold. 220

#### B.4. Testing with exact distributions 225

In what follows, we provide the empirical sizes and powers of exact tests. We adopt the Gaussian distribution in Section 5.2 in the main paper. We compare the performances of the Spearman test and the Kendall test using theoretical thresholds to the performance of the Spearman and Kendall tests using simulation-based thresholds. We refer to the Spearman test and the Kendall test using simulation-based thresholds as the Spearman exact test and Kendall exact test, respectively. 230

Results over 5,000 simulated data sets are given in Table 2. We observe that the sizes of the two exact tests are well controlled, and their powers are higher than the corresponding tests that use the theoretical threshold  $q_\alpha$ . This reflects the extra gain in power by resorting to the exact tests.

#### B.5. Real data analysis 235

We study the empirical performance of competing tests on a real stock market data. We collect the daily closing prices of 452 stocks in the Standard and Poor 500 index from January 1, 2003 to January 1, 2008, available on `finance.yahoo.com`. We study the nearly independent monthly log return data (Xue et al., 2012). All together, the corresponding data matrix has  $n = 59$  rows and  $d = 452$  columns.

In order to evaluate the control of size for the seven tests, we simulate data sets with independent columns based on the real monthly log return data matrix. We generate each simulated data set by randomly permuting the entries within each column of the data matrix. This permutation preserves the empirical marginal distribution for each of the 452 column variables, i.e. the stock prices, but, within each row, the 452 column variables are mutually independent. 240

We apply the six competing tests to 1,000 permuted data sets, and report the resulting  $p$ -values in Figure 1. 245

Since the entries within each column have been permuted, the corresponding 452 entries are completely independent and the histograms shall be close to that of the uniform distribution in  $[0, 1]$ . We find that the histograms of our proposed tests are relatively flat and the proposed tests can effectively control the size. In comparison, the histograms of  $p$ -values from Zhou (2007) and Mao (2014) are strongly skewed to the left, indicating that the tests tend to falsely reject the null hypothesis. The reason is that Zhou (2007) and Mao (2014) are very sensitive to extreme events as observed in Section 5.2 as well as in Shao & Zhou 250

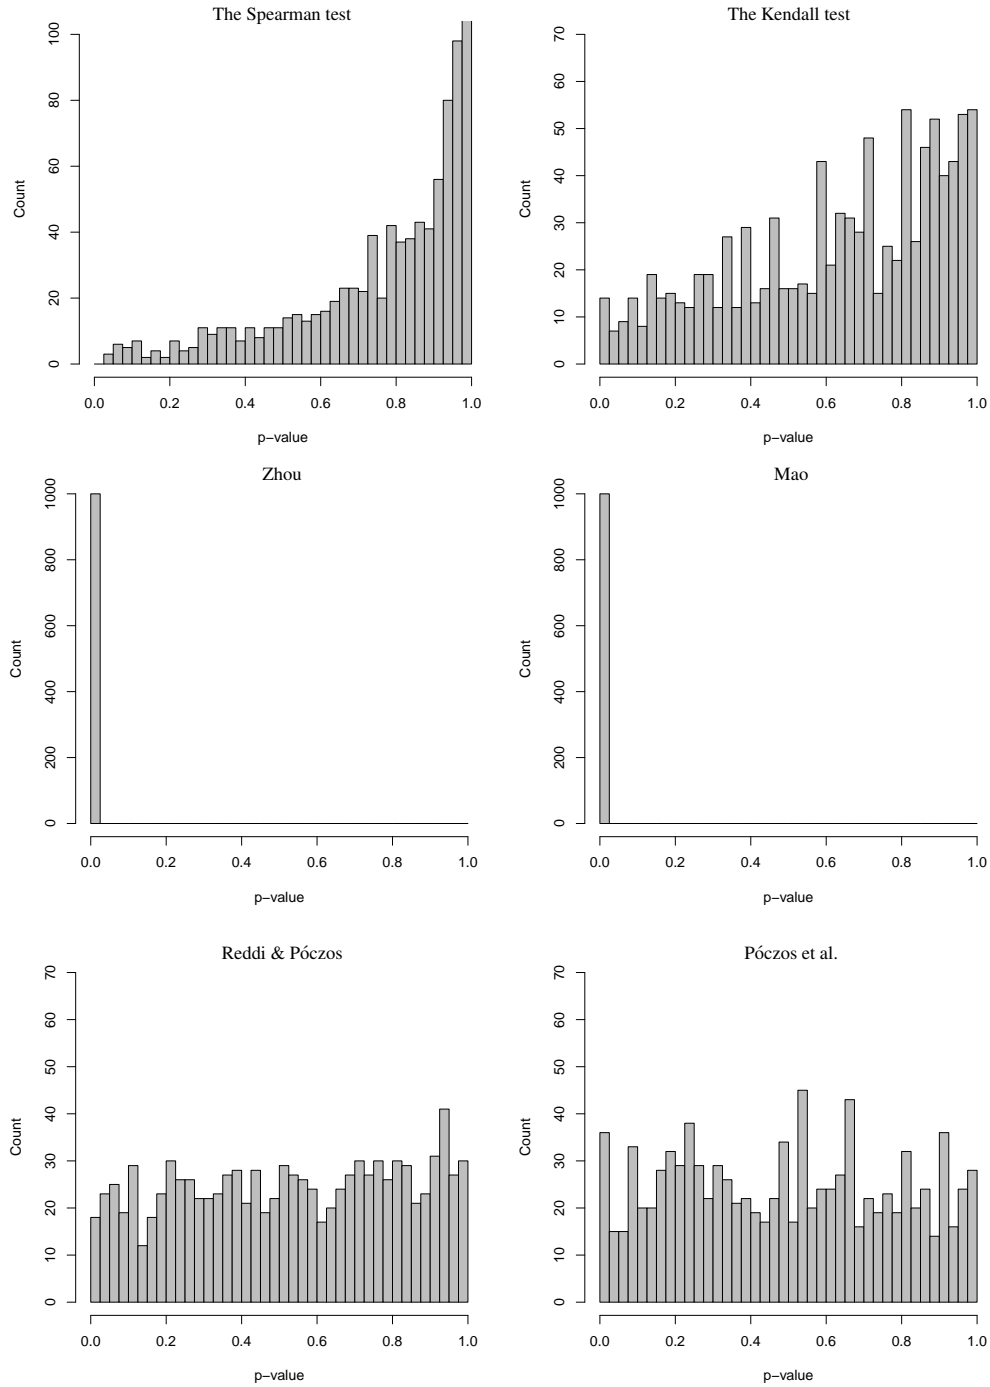

Fig. 1: Histograms of the  $p$ -values of six competing methods on 1,000 permuted monthly log return data. The empirical probabilities of the  $p$ -values less than 0.05 are 0.003, 0.021, 1.000, 1.000, 0.041, and 0.051 for the Spearman test, the Kendall test, the tests of Zhou (2007), Mao (2014), Reddi & Póczos (2013), and Póczos et al. (2012), respectively.



Table 1: Empirical sizes and powers of the Spearman test, the test of Mao (2016), and the test of Leung & Drton (2017) in percentages

| $n$ | $d$ | Spearman                           | Leung & Drton (2017) | Mao (2016) | Spearman                                  | Leung & Drton (2017) | Mao (2016) |
|-----|-----|------------------------------------|----------------------|------------|-------------------------------------------|----------------------|------------|
|     |     | Gaussian null distribution         |                      |            | Gaussian alternative distribution         |                      |            |
| 60  | 50  | 2.8                                | 5.1                  | 5.4        | 91.9                                      | 30.9                 | 31.8       |
|     | 200 | 1.8                                | 5.1                  | 5.2        | 84.3                                      | 7.4                  | 7.5        |
|     | 800 | 1.2                                | 4.9                  | 5.0        | 76.3                                      | 5.6                  | 5.7        |
| 100 | 50  | 3.8                                | 4.6                  | 4.9        | 97.1                                      | 59.9                 | 60.3       |
|     | 200 | 2.5                                | 4.6                  | 4.7        | 93.7                                      | 11.6                 | 11.8       |
|     | 800 | 1.8                                | 5.2                  | 5.3        | 92.3                                      | 5.4                  | 5.4        |
|     |     | Light-tailed null distribution     |                      |            | Light-tailed alternative distribution     |                      |            |
| 60  | 50  | 2.5                                | 4.4                  | 4.6        | 90.9                                      | 31.9                 | 32.6       |
|     | 200 | 1.7                                | 4.8                  | 5.0        | 84.5                                      | 6.2                  | 6.3        |
|     | 800 | 1.1                                | 4.8                  | 4.9        | 76.0                                      | 5.3                  | 5.4        |
| 100 | 50  | 3.5                                | 4.4                  | 4.8        | 96.7                                      | 60.0                 | 60.6       |
|     | 200 | 2.8                                | 5.2                  | 5.3        | 94.7                                      | 10.4                 | 10.5       |
|     | 800 | 1.8                                | 4.7                  | 4.8        | 91.7                                      | 5.9                  | 5.9        |
|     |     | Heavy-tailed null distribution     |                      |            | Heavy-tailed alternative distribution     |                      |            |
| 60  | 50  | 2.5                                | 5.1                  | 5.4        | 91.0                                      | 31.5                 | 32.0       |
|     | 200 | 1.8                                | 5.2                  | 5.3        | 84.0                                      | 7.4                  | 7.5        |
|     | 800 | 1.1                                | 4.2                  | 4.3        | 76.0                                      | 5.3                  | 5.4        |
| 100 | 50  | 3.7                                | 4.7                  | 4.8        | 96.7                                      | 60.3                 | 61.0       |
|     | 200 | 3.0                                | 4.1                  | 4.2        | 94.5                                      | 11.6                 | 11.7       |
|     | 800 | 2.1                                | 4.7                  | 4.8        | 90.9                                      | 5.2                  | 5.3        |
|     |     | Multivariate $t$ null distribution |                      |            | Multivariate $t$ alternative distribution |                      |            |
| 60  | 50  | 2.8                                | 4.4                  | 4.6        | 95.2                                      | 28.7                 | 29.5       |
|     | 200 | 1.6                                | 4.8                  | 5.0        | 79.4                                      | 7.0                  | 7.1        |
|     | 800 | 1.2                                | 5.2                  | 5.3        | 40.0                                      | 5.2                  | 5.2        |
| 100 | 50  | 4.1                                | 4.7                  | 5.1        | 99.7                                      | 61.0                 | 61.6       |
|     | 200 | 2.6                                | 5.2                  | 5.3        | 99.5                                      | 9.4                  | 9.6        |
|     | 800 | 1.9                                | 4.6                  | 4.6        | 98.6                                      | 5.1                  | 5.1        |
|     |     | Exponential null distribution      |                      |            | Exponential alternative distribution      |                      |            |
| 60  | 50  | 1.7                                | 4.7                  | 5.0        | 90.5                                      | 94.1                 | 94.4       |
|     | 200 | 0.8                                | 5.0                  | 5.2        | 83.0                                      | 100.0                | 100.0      |
|     | 800 | 0.2                                | 4.3                  | 4.4        | 74.7                                      | 100.0                | 100.0      |
| 100 | 50  | 2.9                                | 4.7                  | 5.1        | 96.9                                      | 98.3                 | 98.3       |
|     | 200 | 1.8                                | 5.0                  | 5.1        | 94.0                                      | 100.0                | 100.0      |
|     | 800 | 0.7                                | 5.3                  | 5.4        | 91.4                                      | 100.0                | 100.0      |
|     |     | Cauchy null distribution           |                      |            |                                           |                      |            |
| 60  | 50  | 1.5                                | 4.7                  | 4.8        | -                                         | -                    | -          |
|     | 200 | 0.6                                | 4.7                  | 4.8        | -                                         | -                    | -          |
|     | 800 | 0.2                                | 4.8                  | 4.9        | -                                         | -                    | -          |
| 100 | 50  | 3.1                                | 5.1                  | 5.4        | -                                         | -                    | -          |
|     | 200 | 1.7                                | 5.1                  | 5.1        | -                                         | -                    | -          |
|     | 800 | 0.7                                | 4.7                  | 4.7        | -                                         | -                    | -          |

Results are averaged over 5,000 simulated data sets.

(2014). And here the log return data contain extreme events and are heavy-tailed (Rachev, 2003), which are not eliminated by permutation. Finally, kernel-based tests can control the size, which agrees with our findings in Section 5.2 in the main paper.

## C. TECHNICAL PROOFS

### C.1. Overview

In this section, we provide the technical proofs of the theoretical results in the main paper and in Section A of the Supplementary Material. For ease of reading, we defer the technical lemmas to Section C.8.

Table 2: Empirical sizes and powers of simulation-based rejection thresholds in percentages

| $n$ | $d$ | Gaussian null distribution |               |          |         | Gaussian alternative distribution |               |          |         |
|-----|-----|----------------------------|---------------|----------|---------|-----------------------------------|---------------|----------|---------|
|     |     | Spearman exact             | Kendall exact | Spearman | Kendall | Spearman exact                    | Kendall exact | Spearman | Kendall |
| 60  | 50  | 5.6                        | 5.4           | 1.8      | 2.9     | 89.9                              | 90.7          | 91.9     | 92.8    |
|     | 200 | 4.8                        | 4.0           | 0.8      | 2.5     | 89.0                              | 88.8          | 84.3     | 87.2    |
|     | 800 | 4.1                        | 4.8           | 0.2      | 1.5     | 97.0                              | 97.1          | 97.1     | 97.5    |
| 100 | 50  | 5.9                        | 5.8           | 2.8      | 3.7     | 84.5                              | 84.4          | 76.3     | 81.8    |
|     | 200 | 4.6                        | 5.3           | 1.5      | 2.7     | 95.3                              | 95.2          | 93.7     | 94.3    |
|     | 800 | 5.0                        | 4.8           | 0.8      | 2.2     | 94.4                              | 94.2          | 92.3     | 93.2    |

The Spearman exact and Kendall exact tests use simulation-based rejection thresholds. Results are averaged over 5,000 simulated data sets.

### C.2. Proofs of Theorems 1 and 2

In the proof, Lemma C2 plays a key role in calculating the convergence rate of the limiting distribution. We first prove Theorem 1 in the main paper.

*Proof.* To begin with, we focus on the statistic  $\psi_{jk} \equiv n^{1/2}V_{jk}/\sigma_V$ . In Lemma C2, let  $I \equiv \{(j, k) : 1 \leq j < k \leq d\}$ . For  $u = (j, k) \in I$ , set  $B_u = \{(l, m) \in I : (l, m) \neq (j, k), \{l, m\} \cap \{j, k\} \neq \emptyset\}$ ,  $\eta_u = |\psi_{jk}|$ , and  $A_u = A_{jk} = \{|\psi_{jk}| > t\}$ . We can check that  $b_3 = 0$  in Lemma C2, and

$$|\text{pr}(n^{1/2}L_n/\sigma_V \leq t) - e^{-\lambda_n}| \leq b_{1,n} + b_{2,n}, \quad (\text{C1})$$

where we have

$$\lambda_n = \frac{d(d-1)}{2} \text{pr}(A_{12}). \quad (\text{C2})$$

Using Lemma C4,  $A_{12}$  is independent of  $A_{13}$  and accordingly

$$b_{1,n} \leq d^3 \text{pr}(A_{12})^2, \quad b_{2,n} \leq d^3 \text{pr}(A_{12}A_{13}) = d^3 \text{pr}(A_{13})^2.$$

Here using Lemma C5, when  $t = o(n^{1/6})$ , we have

$$\text{pr}(A_{12}) = \text{pr}(|\psi_{12}| > t) = 2\{1 - \Phi(t)\}\{1 + o(1)\}. \quad (\text{C3})$$

Accordingly, for  $i = 1, 2$ , using the Gaussian tail bound  $\text{pr}\{N_1(0, 1) > t\} \leq e^{-t^2/2}/\{(2\pi)^{1/2}t\}$ , we have

$$b_{i,n} \leq \frac{2}{\pi t^2} d^3 \exp(-t^2) \Rightarrow b_{1,n} + b_{2,n} \leq \frac{4}{\pi t^2} d^3 \exp(-t^2)\{1 + o(1)\}. \quad (\text{C4})$$

We then let

$$t = (4 \log d - \log \log d + y)^{1/2} \asymp (4 \log d)^{1/2}, \quad (\text{C5})$$

and directly plug the above  $t$  into (C1). Because  $\log d = o(n^{1/3})$ , (C3) holds and it follows that

$$b_{1n} + b_{2n} \leq \frac{4}{\pi(4 \log d - \log \log d + y)} d^3 \exp(-4 \log d + \log \log d) = o\left(\frac{1}{d}\right). \quad (\text{C6})$$

On the other hand, using the Gaussian tail bounds in an unpublished technical report by Duembgen (available on [arXiv.org](https://arxiv.org/abs/1012.2063) with identifier 1012.2063), we have for any  $t > 0$ ,

$$\frac{1}{t + 1/t} (2\pi)^{-1/2} \exp\left(-\frac{t^2}{2}\right) \leq 1 - \Phi(t) \leq \frac{1}{t} (2\pi)^{-1/2} \exp\left(-\frac{t^2}{2}\right). \quad (\text{C7})$$

Accordingly, as  $d$  grows, we see that  $t$  diverges to infinity in (C5). We have, as  $t$  grows,

$$1/t - 1/(t + 1/t) = 1/\{t(t^2 + 1)\} \asymp 1/t^3.$$

It yields that

$$1 - \Phi(t) = \frac{1}{(2\pi)^{1/2}t} \exp\left(-\frac{t^2}{2}\right) [1 + O\{(\log d)^{-3/2}\}]. \quad (\text{C8})$$

Combining (C2), (C3), and (C8) implies

$$\begin{aligned} \lambda_n &= d^2 \{1 - \Phi(t)\} \{1 + o(1)\} = \frac{d^2}{(8\pi \log d)^{1/2}} \exp\left(-\frac{4 \log d - \log \log d + y}{2}\right) \{1 + o(1)\} \\ &= (8\pi)^{-1/2} \exp\left(-\frac{y}{2}\right) \{1 + o(1)\}. \end{aligned} \quad (\text{C9})$$

Plugging the above equation to (C1) yields

$$\begin{aligned} & \left| \Pr\left(\frac{nL_n^2}{\sigma_V^2} - 4 \log d + \log \log d \leq y\right) - \exp\left\{- (8\pi)^{-1/2} \exp\left(-\frac{y}{2}\right)\right\} \right| \\ & \leq |\Pr(n^{1/2}L_n/\sigma_V \leq t) - \exp(-\lambda_n)| + |\exp(-\lambda_n) - \exp\{- (8\pi)^{-1/2} \exp(-y/2)\}| = o_y(1), \end{aligned} \quad (\text{C10})$$

which completes the proof.  $\square$

The proof of Theorem 2 is very similar to the proof of Theorem 1. One only needs to replace (C22) with (C23) when applying Lemma C5. The proof is thus omitted.

### C.3. Proofs of Theorems 3 and 4

The proofs are based on several concentration inequalities developed in Section C.8. We prove Theorem 3 first.

*Proof.* The test statistic  $nL_n^2/\sigma_V^2$  is scale and location invariant. Hence, without loss of generality, we assume that  $\sum_{i=1}^n c_{ni} = 0$  in this proof. Using (4), we have  $E_{H_0}(V_{jk}) = 0$  and

$$\widehat{V}_{jk} = \frac{V_{jk}}{\sigma_V} = \frac{V_{jk}\{1 + o(1)\}}{A_1}.$$

Let  $\Delta$  be a Lipschitz constant of both  $g(\cdot)$  introduced in (1) and  $f(\cdot)$  introduced in (2) in the main paper. Using Lemma C6, it follows that, for sufficiently large  $n$  and some scalar  $c(A_1, A_2, \Delta)$  only depending on  $A_1, A_2$ , and  $\Delta$ , for any  $t > 0$ ,

$$\Pr(|\widehat{V}_{jk} - V_{jk}| > t) \leq 2 \exp\{-nt^2/c(A_1, A_2, \Delta)\}.$$

We then have

$$\Pr\left(\max_{j < k} |\widehat{V}_{jk} - V_{jk}| > t\right) \leq d^2 \exp\{-nt^2/c(A_1, A_2, \Delta)\},$$

which implies that, with probability at least  $1 - d^{-1}$ ,

$$\max_{j,k} |\widehat{V}_{jk} - V_{jk}| \leq \left\{ \frac{3c(A_1, A_2, \Delta) \log d}{n} \right\}^{1/2}.$$

Therefore, we have, for  $n$  large enough, there exists a large enough constant  $C$  such that

$$nL_n^2/\sigma_V^2 = n \max_{j < k} \widehat{V}_{jk}^2 \geq n \left( \max_{j,k} |V_{jk}| - \max_{j,k} |\widehat{V}_{jk} - V_{jk}| \right)^2 \geq \{C - 3^{1/2}c(A_1, A_2, \Delta)^{1/2}\}^2 \log d.$$

Accordingly, by choosing  $C > 2 + 3^{1/2}c(A_1, A_2, \Delta)^{1/2}$ , we have with probability no smaller than  $1 - d^{-1}$ ,

$$nL_n^2/\sigma_V^2 > (4 + \epsilon) \log d,$$

for some small constant  $\epsilon$ . Accordingly, for any given  $q_\alpha$ , with probability tending to 1,

$$nL_n^2/\sigma_V^2 > 4 \log d - \log \log d - q_\alpha.$$

This completes the proof.  $\square$

We then prove Theorem 4 in the main paper.

*Proof.* The proof is similar to that of Theorem 3. Because the test statistic  $n\tilde{L}_n^2/\sigma_U^2$  is scale and location invariant, without loss of generality, we assume  $E_{H_0}\{h(X_1, \dots, X_m)\} = 0$ . Then it is immediately clear that  $E_{H_0}(U_{jk}) = 0$ . Moreover, by a standard argument of  $U$ -statistics (see, e.g., Serfling (2002)), we have

$$\begin{aligned} n\text{var}_{H_0}(U_{jk}) &= \tilde{\sigma}_U^2\{1 + o(1)\} \\ &= m^2 \text{var}_{H_0}[E_{H_0}\{h(X_{1,\{1,2\}}, \dots, X_{m,\{1,2\}}) \mid X_{1,\{1,2\}}\}]\{1 + o(1)\} \\ &= A_4\{1 + o(1)\}, \end{aligned}$$

where  $\tilde{\sigma}_U^2$  is defined in (15) in the main paper. Then using Lemma C7, we have for large  $n$  and some scalar  $c(A_3, A_4, m)$  only depending on  $A_3, A_4$  and  $m$ , for any  $t > 0$

$$\text{pr}(|\hat{U}_{jk} - U_{jk}| > t) \leq 2 \exp\{-nt^2/c(A_3, A_4, m)\}.$$

The rest is a line-by-line follow of Theorem 3's proof.  $\square$

#### C.4. Proof of Theorem 5

*Proof.* Consider the Gaussian setting and a simple alternative set of parameters

$$\mathcal{F}(\rho) = \{M : M = I_d + \rho e_1 e_j^\top + \rho e_j e_1^\top, e_k = (\underbrace{0, \dots, 0}_{k-1}, 1, 0, \dots, 0), 1 \leq k \leq d, j = 2, \dots, d\}.$$

Let  $\mu_\rho$  be the uniform measure on  $\mathcal{F}(\rho)$  and  $\rho = c_0(\log d/n)^{1/2}$  for some small enough constant  $c_0 < 1$ . Let  $\text{pr}_\Sigma$  denote the probability measure of  $N_d(0, \Sigma)$  and  $\text{pr}_{\mu_\rho} = \int \text{pr}_\Sigma d\mu_\rho(\Sigma)$ . Let  $\text{pr}_0$  denote the probability measure of  $N_d(0, I_d)$ . Note that, for any set  $A$ , we have

$$\sup_{\Sigma \in \mathcal{F}(\rho)} \text{pr}_\Sigma(A^C) \geq \text{pr}_{\mu_\rho}(A^C), \quad 1 = \text{pr}_{\mu_\rho}(A^C) + \text{pr}_{\mu_\rho}(A),$$

and

$$\text{pr}_{\mu_\rho}(A) \leq \text{pr}_0(A) + |\text{pr}_{\mu_\rho}(A) - \text{pr}_0(A)|.$$

Letting  $A \equiv \{T_\alpha = 1\}$ , the above equations yield

$$\inf_{T_\alpha \in \mathcal{T}_\alpha} \sup_{\Sigma \in \mathcal{F}(\rho)} \text{pr}_\Sigma(T_\alpha = 0) \geq 1 - \alpha - \sup_{A: \text{pr}_0(A) \leq \alpha} |\text{pr}_{\mu_\rho}(A) - \text{pr}_0(A)| \geq 1 - \alpha - \frac{1}{2} \|\text{pr}_{\mu_\rho} - \text{pr}_0\|_{TV},$$

where  $\|\cdot\|_{TV}$  denotes the total variation norm. Setting  $L_{\mu_\rho}(y) \equiv d\text{pr}_{\mu_\rho}(y)/d\text{pr}_0(y)$ , and by Jensen's inequality, we have

$$\|\text{pr}_{\mu_\rho} - \text{pr}_0\|_{TV} = \int |L_{\mu_\rho}(y) - 1| d\text{pr}_0(y) = E_{\text{pr}_0} |L_{\mu_\rho}(Y) - 1| \leq [E_{\text{pr}_0} \{L_{\mu_\rho}^2(Y)\} - 1]^{1/2}.$$

Therefore, as long as  $E_{\text{pr}_0} \{L_{\mu_\rho}^2(Y)\} = 1 + o(1)$ , we have

$$\inf_{T_\alpha \in \mathcal{T}_\alpha} \sup_{\Sigma \in \mathcal{F}(\rho)} \text{pr}_\Sigma(T_\alpha = 0) \geq 1 - \alpha - o(1) > 0. \quad (\text{C11})$$

We then prove that  $E_{\text{pr}_0} \{L_{\mu_\rho}^2(Y)\} = 1 + o(1)$ . By construction, we have

$$L_{\mu_\rho} = \frac{1}{d-1} \sum_{\Sigma \in \mathcal{F}(\rho)} \left[ \prod_{i=1}^n \frac{1}{|\Sigma|^{1/2}} \exp \left\{ -\frac{1}{2} Z_{i,\cdot}^\top (\Omega - I_d) Z_{i,\cdot} \right\} \right],$$

where  $\Omega \equiv \Sigma^{-1}$  and  $Z_{1,\cdot}, \dots, Z_{n,\cdot}$  are  $d$ -dimensional vectors to be specified later. We have

330

$$E_{\text{pr}_0}\{L_{\mu\rho}^2(Y)\} = \frac{1}{(d-1)^2} \sum_{\Sigma_1, \Sigma_2 \in \mathcal{F}(\rho)} E \left[ \prod_{i=1}^n \frac{1}{|\Sigma_1|^{1/2}} \frac{1}{|\Sigma_2|^{1/2}} \exp \left\{ -\frac{1}{2} Z_{i,\cdot}^\top (\Omega_1 + \Omega_2 - 2I_d) Z_{i,\cdot} \right\} \right],$$

where  $\Omega_i \equiv \Sigma_i^{-1}$  for  $i = 1, 2$  and  $\{Z_{i,\cdot}, 1 \leq i \leq n\}$  are independent and identically distributed as  $N_d(0, I_d)$ . We write

$$A = \frac{\rho}{1-\rho^2} \begin{pmatrix} 2\rho & -1 & -1 \\ -1 & \rho & 0 \\ -1 & 0 & \rho \end{pmatrix}, \quad B = \frac{2\rho}{1-\rho^2} \begin{pmatrix} \rho & -1 \\ -1 & \rho \end{pmatrix}.$$

It is easy to derive that

$$E_{\text{pr}_0}(L_{\mu\rho}^2) = \underbrace{\frac{d-2}{d-1} \prod_{i=1}^n \left[ \frac{1}{1-\rho^2} E \left\{ \exp \left( -\frac{1}{2} Z_{i,\cdot}^\top A Z_{i,\cdot} \right) \right\} \right]}_{E_1} + \underbrace{\frac{1}{d-1} \prod_{i=1}^n \left[ \frac{1}{1-\rho^2} E \left\{ \exp \left( -\frac{1}{2} Z_{i,\cdot}^\top B Z_{i,\cdot} \right) \right\} \right]}_{E_2},$$

335

where  $E_1$  represents the set of  $(\Sigma_1, \Sigma_2)$  with  $\Sigma_1 \neq \Sigma_2$ , and  $E_2$  represents the set of  $(\Sigma_1, \Sigma_2)$  with  $\Sigma_1 = \Sigma_2$ . By standard argument in moment generating functions of the Gaussian quadratic form, we have

$$E_1 = \frac{d-2}{d-1} \frac{1}{(1-\rho^2)^n} \{1 + \lambda_1(A)\} \{1 + \lambda_2(A)\} \{1 + \lambda_3(A)\}^{-n/2},$$

where  $\lambda_i(A)$  is the  $i$ th eigenvalue of  $A$ . Moreover, we have  $\{1 + \lambda_1(A)\} \{1 + \lambda_2(A)\} \{1 + \lambda_3(A)\} = |A + I_d| = (1 - \rho^2)^{-2}$ . When  $d$  grows with  $n$ , we know that

$$E_1 = \frac{1}{(1-\rho^2)^n} (1 - \rho^2)^n \{1 + o(1)\} = 1 + o(1). \quad (\text{C12})$$

340

For  $E_2$ , it is easy to calculate that  $\lambda_1(B) = 2\rho/(1-\rho)$  and  $\lambda_2(B) = -2\rho/(1+\rho)$ . Similar to the calculation of  $E_1$ , we have  $E_2 = (d-1)^{-1} (1-\rho^2)^{-n}$ . Recalling that  $\rho = c_0(\log d/n)^{1/2}$  and  $\log d/n = o(1)$ , we have

$$E_2 = (d-1)^{-1} (1 - c_0^2 \log d/n)^{-n} = (d-1)^{-1} \exp(c_0^2 \log d) \{1 + o(1)\} = o(1) \quad (\text{C13})$$

as long as  $c_0 < 1$ . Combining (C12) and (C13) yields (C11). Lastly, because the Pearson's covariance matrix  $\Sigma \in \mathcal{F}(\rho)$  implies that the Pearson's correlation matrix  $R \in \mathcal{F}(\rho)$ , we have  $\{X : \Sigma \in \mathcal{F}(\rho)\} \subset \{X : R \in \mathcal{F}(\rho)\}$  and thus

345

$$\inf_{T_\alpha \in \mathcal{T}_\alpha} \sup_{R \in \mathcal{F}(\rho)} \text{pr}_\Sigma(T_\alpha = 0) \geq \inf_{T_\alpha \in \mathcal{T}_\alpha} \sup_{\Sigma \in \mathcal{F}(\rho)} \text{pr}_\Sigma(T_\alpha = 0) \geq 1 - \alpha - o(1) > 0.$$

This completes the proof.  $\square$

### C.5. Proofs of Theorems A3 and A5

We first prove Theorem A3.

350

*Proof.* By checking the proof of Theorem 4 in Cai & Jiang (2011), we only need to verify the following three statements to show that Theorem A3 holds.

**S1.** Suppose that  $Z \equiv (Z_1, Z_2, Z_3, Z_4)^\top \sim N_4(0, \Sigma_1)$  with

$$\Sigma_1 \equiv \begin{bmatrix} 1 & 0 & r & 0 \\ 0 & 1 & 0 & 0 \\ r & 0 & 1 & 0 \\ 0 & 0 & 0 & 1 \end{bmatrix}, \quad |r| \leq 1.$$

Let  $Z_{1,\cdot}, \dots, Z_{n,\cdot} \in \mathcal{R}^4$ , with  $Z_{i,\cdot} = (Z_{i,1}, \dots, Z_{i,4})^\top$ , be  $n$  independent observations of  $Z$ . Further set  $t_n \equiv \{(4 \log d - \log \log d + y)/n\}^{1/2}$  for some fixed  $y \in \mathcal{R}$ , as  $n$  grows, and  $\log d = o(n^{1/3})$ . We have

$$\sup_{|r| \leq 1} \text{pr}(3\tau_{12}/2 > t_n, 3\tau_{34}/2 > t_n) = O(d^{-4}),$$

where for  $(j, k) \in \{(1, 2), (3, 4)\}$ ,

$$\tau_{jk} \equiv \frac{2}{n(n-1)} \sum_{1 \leq i < i' \leq n} \text{sign}(Z_{i,j} - Z_{i',j}) \text{sign}(Z_{i,k} - Z_{i',k}).$$

**S2** Suppose that  $Z \equiv (Z_1, Z_2, Z_3, Z_4)^\top \sim N_4(0, \Sigma_2)$  with

$$\Sigma_2 \equiv \begin{bmatrix} 1 & 0 & r_1 & 0 \\ 0 & 1 & r_2 & 0 \\ r_1 & r_2 & 1 & 0 \\ 0 & 0 & 0 & 1 \end{bmatrix}, \quad |r_1| \leq 1, |r_2| \leq 1.$$

Let  $Z_{1,\cdot}, \dots, Z_{n,\cdot} \in \mathcal{R}^4$ , with  $Z_{i,\cdot} = (Z_{i,1}, \dots, Z_{i,4})^\top$ , be  $n$  independent observations of  $Z$ . Then set  $t_n \equiv \{(4 \log d - \log \log d + y)/n\}^{1/2}$  for some fixed  $y \in \mathcal{R}$ ,  $n$  and  $d$  grow, and  $\log d = o(n^{1/3})$ . We have

$$\sup_{|r_1| \leq 1, |r_2| \leq 1} \text{pr}(3\tau_{12}/2 > t_n, 3\tau_{34}/2 > t_n) = O(d^{-4}).$$

**S3** Suppose that  $Z \equiv (Z_1, Z_2, Z_3, Z_4)^\top \sim N_4(0, \Sigma_3)$  with

$$\Sigma_3 \equiv \begin{bmatrix} 1 & 0 & r_1 & 0 \\ 0 & 1 & 0 & r_2 \\ r_1 & 0 & 1 & 0 \\ 0 & r_2 & 0 & 1 \end{bmatrix}, \quad |r_1| \leq 1, |r_2| \leq 1.$$

Let  $Z_{1,\cdot}, \dots, Z_{n,\cdot} \in \mathcal{R}^4$ , with  $Z_{i,\cdot} = (Z_{i,1}, \dots, Z_{i,4})^\top$ , be  $n$  independent replicates of  $Z$ . Then setting  $t_n \equiv \{(4 \log d - \log \log d + y)/n\}^{1/2}$  for some fixed  $y \in \mathcal{R}$ , as  $n$  and  $d$  grow, and  $\log d = o(n^{1/3})$ . Then we have, for any fixed  $\delta \in (0, 1)$ , there exists  $\epsilon_0 = \epsilon(\delta) > 0$  such that

$$\sup_{|r_1|, |r_2| \leq 1 - \delta} \text{pr}(3\tau_{12}/2 > t_n, 3\tau_{34}/2 > t_n) = O(d^{-2-\epsilon_0}).$$

For showing **S1**, **S2**, and **S3** hold, consider the general setting where  $Z \equiv (Z_1, Z_2, Z_3, Z_4)^\top \sim N_4(0, \Sigma)$  and  $\Sigma$  has diagonals all equal one. The Kendall's tau correlation coefficient is a  $U$ -statistic with degree two and the kernel function bounded by one. By exploiting the Hájek's projection (Hájek et al., 1999), with a little abuse of notation, we can write

$$3\tau_{jk}/2 = \frac{2}{n} \sum_{i=1}^n E(3\tau_{jk}/2 \mid Z_{i,\{j,k\}}) + E_{jk} = \frac{1}{n} \sum_{i=1}^n \underbrace{E(3\tau_{jk} \mid Z_{i,\{j,k\}})}_{\Psi_{i,jk}} + E_{jk}, \quad (\text{C14})$$

where  $\Psi_{1,jk}, \Psi_{2,jk}, \dots, \Psi_{n,jk}$  are  $n$  independent random variables, and  $E_{jk}$  is a degenerate  $U$ -statistic. Moreover, both  $\Psi_{i,jk}$  and  $E_{jk}$  are bounded. Using (C14) and the Slutsky's argument, we can further write

$$\begin{aligned}
& \text{pr}(3\tau_{12}/2 > t_n, 3\tau_{34}/2 > t_n) \\
& = \text{pr}\left(\frac{1}{n} \sum_{i=1}^n \Psi_{i,12} + E_{12} > t_n, \frac{1}{n} \sum_{i=1}^n \Psi_{i,34} + E_{34} > t_n\right) \\
& \leq \text{pr}\left(\frac{1}{n} \sum_{i=1}^n \Psi_{i,12} > t_n - \epsilon_1, \frac{1}{n} \sum_{i=1}^n \Psi_{i,34} > t_n - \epsilon_1\right) + \text{pr}(E_{12} > \epsilon_1) + \text{pr}(E_{34} > \epsilon_1) \\
& , \quad = \text{pr}\left\{n^{-1/2} \sum_{i=1}^n \Psi_{i,12} > n^{1/2}(t_n - \epsilon_1), n^{-1/2} \sum_{i=1}^n \Psi_{i,34} > n^{1/2}(t_n - \epsilon_1)\right\} \\
& \quad + \text{pr}(E_{12} > \epsilon_1) + \text{pr}(E_{34} > \epsilon_1)
\end{aligned} \tag{375}$$

where  $\epsilon_1$  is a constant to be specified later. Because  $|\Psi_{i,jk}n^{-1/2}| \leq 3n^{-1/2}$  for  $(j, k) \in \{(1, 2), (3, 4)\}$ , using Theorem 1 in Zaitsev (1987), we have

$$\begin{aligned}
& \text{pr}\left\{n^{-1/2} \sum_{i=1}^n \Psi_{i,12} > n^{1/2}(t_n - \epsilon_1), n^{-1/2} \sum_{i=1}^n \Psi_{i,34} > n^{1/2}(t_n - \epsilon_1)\right\} \\
& \leq \text{pr}\left\{Y_1 \geq n^{1/2}(t_n - \epsilon_1 - \epsilon_2), Y_2 \geq n^{1/2}(t_n - \epsilon_1 - \epsilon_2)\right\} + c_1 \exp(-n\epsilon_2/c_2), \tag{C15}
\end{aligned} \tag{380}$$

where  $c_1$  and  $c_2$  are two positive constants and  $(Y_1, Y_2)^\top$  is bivariate Gaussian with mean zero and covariance matrix

$$\Sigma_Y = \text{cov}\left\{\left(n^{1/2} \sum_{i=1}^n \Psi_{i,12}, n^{1/2} \sum_{i=1}^n \Psi_{i,34}\right)^\top\right\}.$$

We then determine what  $\Sigma_Y$  is. Recall that under **S1**, **S2**, or **S3**,  $Z_j, Z_k$  are independent for  $(j, k) \in \{(1, 2), (3, 4)\}$ . We can write

$$\Psi_{i,jk} = E(3\tau_{jk} \mid Z_{i,\{j,k\}}) = 3E\{\text{sign}(Z_{i,j} - \tilde{Z}_j)\text{sign}(Z_{i,k} - \tilde{Z}_k) \mid Z_{i,j}, Z_{i,k}\},$$

where  $(\tilde{Z}_j, \tilde{Z}_k)^\top$  is an independent copy of  $(Z_{i,j}, Z_{i,k})^\top$ . Because  $\tilde{Z}_j$  is independent of  $\tilde{Z}_k$ , we can write

$$\begin{aligned}
& 3E\{\text{sign}(Z_{i,j} - \tilde{Z}_j)\text{sign}(Z_{i,k} - \tilde{Z}_k) \mid Z_{i,j}, Z_{i,k}\} \\
& = 3E\{\text{sign}(Z_{i,j} - \tilde{Z}_j) \mid Z_{i,j}\}E\{\text{sign}(Z_{i,k} - \tilde{Z}_k) \mid Z_{i,k}\} \\
& = 3\{\text{pr}(\tilde{Z}_j > Z_{i,j} \mid Z_{i,j}) - \text{pr}(\tilde{Z}_j < Z_{i,j} \mid Z_{i,j})\}\{\text{pr}(\tilde{Z}_k > Z_{i,k} \mid Z_{i,k}) - \text{pr}(\tilde{Z}_k < Z_{i,k} \mid Z_{i,k})\}.
\end{aligned} \tag{C16}$$

Using the property of the Gaussian distribution, (C16) yields

$$\Psi_{i,jk} = 3\{1 - 2\Phi(Z_{i,j})\}\{1 - 2\Phi(Z_{i,k})\}, \tag{C17}$$

where  $\Phi(\cdot)$  is the distribution function of the standard Gaussian. Using the result in Example 2 in the main paper, we know

$$n\text{var}(\tau_{jk}) = \frac{2(2n+5)}{9(n-1)} = \frac{4}{9} + o(1).$$

Combining it with Lemma A in Page 183 in Serfling (2002) yields that

$$n\text{var}(3\tau_{jk}) = 4 + o(1) = 4\text{var}(\Psi_{1,jk}) + O(n^{-1}).$$

Because  $\text{var}(\Psi_{i,jk})$  is a constant irrelevant to  $n$ , we have  $\text{var}(\Psi_{i,jk}) = 1$  for  $i = 1, \dots, n$  and  $(j, k) \in \{(1, 2), (3, 4)\}$ . This yields

$$[\Sigma_Y]_{11} = [\Sigma_Y]_{22} = \text{var}(\Psi_{1,12}) = 1.$$

In the end, we determine the value of  $[\Sigma_Y]_{12}$ . It is immediately clear that

$$[\Sigma_Y]_{12} = \text{cov}\left(n^{-1/2} \sum_{i=1}^n \Psi_{i,12}, n^{-1/2} \sum_{i=1}^n \Psi_{i,34}\right) = \text{cov}(\Psi_{1,12}, \Psi_{1,34}).$$

395 Using (C17), we can further write

$$\text{cov}(\Psi_{1,12}, \Psi_{1,34}) = 9E\{1 - 2\Phi(Z_1)\}\{1 - 2\Phi(Z_2)\}\{1 - 2\Phi(Z_3)\}\{1 - 2\Phi(Z_4)\}. \quad (\text{C18})$$

Using (C18), we are now ready to prove that statements **S1**, **S2**, and **S3** hold. Recall that  $(Y_1, Y_2)^\top \sim N_2(0, I_2)$ . (C14) yields

$$\begin{aligned} \text{pr}(3\tau_{12}/2 > t_n, 3\tau_{34}/2 > t_n) &\leq \text{pr}\{Y_1 \geq n^{1/2}(t_n - \epsilon_1 - \epsilon_2), Y_2 \geq n^{1/2}(t_n - \epsilon_1 - \epsilon_2)\} \\ &+ c_1 \exp(-n\epsilon_2/c_2) + \text{pr}(E_{12} > \epsilon_1) + \text{pr}(E_{34} > \epsilon_1). \end{aligned}$$

400

Both  $E_{12}$  and  $E_{34}$  are degenerate  $U$ -statistics with kernel function bounded. From Proposition 2.3 in Arcones & Gine (1993), we know that there exist constants  $c_3, c_4$  such that

$$\text{pr}(E_{12} > \epsilon_1) \leq c_3 \exp(-c_4 n \epsilon_1), \quad \text{pr}(E_{34} > \epsilon_1) \leq c_3 \exp(-c_4 n \epsilon_1).$$

Recalling that  $t_n = \{(4 \log d - \log \log d + y)/n\}^{1/2} \asymp (4 \log d/n)^{1/2}$  and  $\log d = o(n^{1/3})$ , we can pick  $\epsilon_1, \epsilon_2$  small enough such that  $\epsilon_1, \epsilon_2 \asymp n^{-2/3}$ . In this way, we have for any constant  $c > 0$ , there exists a scalar  $C$  depending on  $c$  such that, for  $n$  large enough,

405

$$\exp(-c n \epsilon_i) \leq \exp(-C n^{1/3}) = o(d^{-4}), \quad i = 1, 2,$$

and  $\epsilon_1 = o(t_n)$ ,  $\epsilon_2 = o(t_n)$ .

For **S1** and **S2**, we know that  $Z_4$  is independent of  $Z_1, Z_2, Z_3$ , and accordingly

$$\begin{aligned} \text{cov}(\Psi_{1,12}, \Psi_{1,34}) &= 9E\{1 - 2\Phi(Z_1)\}\{1 - 2\Phi(Z_2)\}\{1 - 2\Phi(Z_3)\}\{1 - 2\Phi(Z_4)\} \\ &= 9E\{1 - 2\Phi(Z_1)\}\{1 - 2\Phi(Z_2)\}\{1 - 2\Phi(Z_3)\}E\{1 - 2\Phi(Z_4)\} = 0. \end{aligned}$$

410

Therefore, we have  $(Y_1, Y_2)^\top \sim N_2(0, I_2)$  and accordingly

$$\begin{aligned} \text{pr}(3\tau_{12}/2 > t_n, 3\tau_{34}/2 > t_n) &\leq [\text{pr}\{Y_1 \geq n^{1/2}(t_n - \epsilon_1 - \epsilon_2)\}]^2 + c_1 \exp(-n\epsilon_2/c_2) \\ &+ \text{pr}(E_{12} > \epsilon_1) + \text{pr}(E_{34} > \epsilon_1) \\ &= (\text{pr}\{Y_1 \geq n^{1/2}t_n\{1 + o(1)\}\})^2 + o(d^{-4}) = o(d^{-4}), \end{aligned}$$

where we use the Gaussian tail bound that for any  $t > 0$ ,

$$\{\text{pr}(Y_1 > t)\}^2 \leq \frac{2}{\pi t^2} \exp(-t^2).$$

415

For proving **S3**, we need one more lemma, which shows that  $[\Sigma_Y]_{12}$  is upper bounded by a constant strictly less than 1 when all off-diagonal values in  $\Sigma_3$  are upper bounded by  $r < 1$ .

LEMMA C1. *Suppose that  $(Z_1, Z_2, Z_3, Z_4)^\top \sim N_4(0, \Sigma_{\text{full}})$  with*

$$\Sigma_{\text{full}} = \begin{bmatrix} 1 & a_1 & a_2 & a_3 \\ a_1 & 1 & a_4 & a_5 \\ a_2 & a_4 & 1 & a_6 \\ a_3 & a_5 & a_6 & 1 \end{bmatrix}.$$

If  $|a_1|, |a_2|, \dots, |a_6| \leq r < 1$ , then we have

$$\sup_{|a_1|, |a_2|, \dots, |a_6| \leq r} |\text{corr}[\{\Phi(Z_1) - 1/2\}\{\Phi(Z_2) - 1/2\}, \{\Phi(Z_3) - 1/2\}\{\Phi(Z_4) - 1/2\}]| = C_r < 1.$$

420

Here  $C_r \leq 1$  only depends on  $r$ . Moreover, we have  $C_r = 1$  only when  $r = 1$  and  $\{a_1, a_2, \dots, a_6\}$  attain the boundary that  $|a_j| = 1$  for some  $j \in \{1, \dots, 6\}$ .



*Proof.* First, we show that  $C_r = 1$  only when  $r = 1$  and  $\{a_1, a_2, \dots, a_6\}$  attain the boundary. When  $C_r = 1$ , we have

$$\{\Phi(Z_1) - 1/2\}\{\Phi(Z_2) - 1/2\} = a\{\Phi(Z_3) - 1/2\}\{\Phi(Z_4) - 1/2\}$$

for some constant  $a$ . This implies that

$$Z_1 = \Phi^{-1} \left[ \frac{a\{\Phi(Z_3) - 1/2\}\{\Phi(Z_4) - 1/2\}}{\Phi(Z_2) - 1/2} + 1/2 \right].$$

We have  $Z_1 \sim N_1(0, 1)$  if and only if  $a\{\Phi(Z_3) - 1/2\}\{\Phi(Z_4) - 1/2\}/\{\Phi(Z_2) - 1/2\} \sim$  425  
 $\text{Unif}(-1/2, 1/2)$ . Here  $\text{Unif}(-1/2, 1/2)$  represents the random variable uniformly distributed  
in the interval  $[-1/2, 1/2]$ . Because when  $Z_2 \neq \pm Z_3$  and  $Z_2 \neq \pm Z_4$ , there is always possi-  
bility such that  $Z_2$  is very close to zero and both  $Z_3$  and  $Z_4$  are away from zero, such that  
 $a\{\Phi(Z_3) - 1/2\}\{\Phi(Z_4) - 1/2\}/\{\Phi(Z_2) - 1/2\}$  is very close to  $\infty$  and outside of  $[-1/2, 1/2]$ .  
Accordingly,  $Z_2$  must be equal to either  $\pm Z_3$  or  $\pm Z_4$ . Or equivalently,  $\{a_1, a_2, \dots, a_6\}$  attain the 430  
boundary  $r = 1$ . This completes the proof of the first part.

Secondly, it is obvious that there is a one-to-one mapping between  $r$  and

$$C_r \equiv \sup_{|a_1|, |a_2|, \dots, |a_6| \leq r} |\text{corr}[\{\Phi(Z_1) - 1/2\}\{\Phi(Z_2) - 1/2\}, \{\Phi(Z_3) - 1/2\}\{\Phi(Z_4) - 1/2\}]|.$$

Accordingly, as long as  $r < 1$ ,  $C_r < 1$  only depends on  $r$ .  $\square$

Using Lemma C1, we can continue to prove **S3** holds. Recall that now  $(Y_1, Y_2)^T \sim N_2(0, \Sigma_Y)$ , where  
Lemma C1 shows  $\sup_{|r_1|, |r_2| \leq 1-\delta} |[\Sigma_Y]_{12}| \leq C_r < 1$ . Thus, we have 435

$$\text{pr}(Y_1 \geq t, Y_2 \geq t) = \text{pr}\{\min(Y_1, Y_2) \geq t\}.$$

Denoting  $\rho \equiv [\Sigma_Y]_{12}$ , using Equation (8) in Nadarajah & Kotz (2008), we have

$$E[\exp\{t \min(Y_1, Y_2)\}] = \exp\left(\frac{t^2}{2}\right) \Phi\left\{\frac{-t(1-\rho)}{(2-2\rho)^{1/2}}\right\}.$$

Using the Chernoff's bounding method, we immediately have

$$\begin{aligned} \sup_{|r_1|, |r_2| \leq 1-\delta} \text{pr}(Y_1 \geq t, Y_2 \geq t) &\leq \sup_{|r_1|, |r_2| \leq 1-\delta} \inf_{\lambda > 0} \frac{E[\exp\{\lambda \min(Y_1, Y_2)\}]}{e^{\lambda t}} \\ &\leq \sup_{|r_1|, |r_2| \leq 1-\delta} \inf_{\lambda > 0} e^{\lambda^2/2 - \lambda t} \Phi\left\{\frac{-\lambda(1-\rho)}{(2-2\rho)^{1/2}}\right\} \\ &= \inf_{\lambda > 0} e^{\lambda^2/2 - \lambda t} \Phi[-\lambda\{(1-C_r)/2\}^{1/2}]. \end{aligned} \quad 440$$

Picking  $\lambda = t$ , the above equation yields

$$\sup_{|r_1|, |r_2| \leq 1-\delta} \text{pr}(Y_1 \geq t, Y_2 \geq t) \leq e^{-t^2/2} \Phi[-t\{(1-C_r)/2\}^{1/2}].$$

Setting  $t = n^{1/2}t_n\{1 + o(1)\}$ , then there exists a constant  $C$  such that

$$\begin{aligned} \sup_{|r_1|, |r_2| \leq 1-\delta} \text{pr}(Y_1 \geq t, Y_2 \geq t) &\leq C d^{-2} (\log d)^{1/2} \text{pr}[Y_1 > \{(1-C_r)/2\}^{1/2} t] \\ &\leq C d^{-2} (\log d)^{1/2} O(d^{-M}), \end{aligned} \quad (\text{C19})$$

where  $M > 0$  is a constant only depending on  $C_r$ . Thus, the statement **S3** holds. 445

All in all, we have **S1**, **S2**, and **S3** all hold. This completes the proof.  $\square$

We then proceed to prove Theorem A5.

*Proof.* We strictly follow the proof of Theorem 5 in the main paper and adopt the same notation system. In particular, we consider the following alternative set of parameters:

$$\mathcal{F}_m(\rho) = \{\Sigma^0 = I_d + \rho e_1 e_1^\top + \rho e_j e_j^\top, \text{ for } j \in \{m+1, m+2, \dots, d\}\}.$$

450 Then the whole proof in Theorem 5 applies here with the only exception that  $E_2 = (d-m)^{-1}(1-\rho^2)^{-n}$ . However, because  $d-m \asymp d$ , we have  $E_2 = (d-m)^{-1}(1-\rho^2)^{-n} \asymp d^{-1}(1-\rho^2)^{-n}$ . Taking  $\rho = c'_0(\log d/n)^{1/2}$ , we still have

$$E_2 \asymp \frac{1}{d}(1 - c_0'^2 \log d/n)^n = d^{-1} \exp(c_0'^2 \log d) \{1 + o(1)\} = o(1).$$

This completes the proof.  $\square$

### C.6. Proofs of Theorems A6, A7, and A8

455 The proof of Theorem A6 is very similar to that of Theorem 1 and is accordingly omitted. In the following we give the proof of Theorem A7.

*Proof.* Assume that the first entry across  $X_{1,\cdot}, \dots, X_{n,\cdot}$  is heterogeneity. It is obvious that  $\text{sign}(X_{i,1} - X_{i',1})$  is invariant to  $\beta_0$  and  $\sigma^2$  given  $\beta_1/\sigma$ . Therefore, without loss of generality, we assume  $\beta_0 = 0$  and  $\sigma^2 = 1$ . Moreover, without loss of generality, we can assume  $\beta_1 \in (0, M)$ , otherwise we can always  
460 replace  $\beta_1$  with  $\min(|\beta_1|, M)$ . We have

$$\begin{aligned} E\{\text{sign}(X_{i',1} - X_{i,1})\} &= \text{pr}(X_{i',1} - X_{i,1} > 0) - \text{pr}(X_{i',1} - X_{i,1} < 0) \\ &= \text{pr}\{Z_{i',1} - Z_{i,1} > -\beta_1(i' - i)/n\} - \text{pr}\{Z_{i',1} - Z_{i,1} < -\beta_1(i' - i)/n\} \\ &= \text{pr}\{Z_{i',1} - Z_{i,1} < \beta_1(i' - i)/n\} - \text{pr}\{Z_{i',1} - Z_{i,1} < -\beta_1(i' - i)/n\}, \end{aligned}$$

where  $Z_{k,1} = \{X_{k,1} - E(X_{k,1})\}/\text{var}(X_{k,1})$  is the standardized version of  $Z_{k,1}$  for  $k = 1, \dots, n$ . Then,  
465 (A3) yields that the density function of  $Z_{i',1} - Z_{i,1}$  is

$$\begin{aligned} \{p_{i'1} * (-p_{i1})\}(z) &= \int_{-\infty}^{\infty} p_{i'1}(z+y)p_{i1}(y)dy \geq D_4 \int_{-M}^M p_{i'1}(z+y)dy \\ &\geq D_4 \int_{\max\{-M+z, -M\}}^{\min\{M+z, M\}} p_{i'1}(y)dy \geq D_4^2(2M - |z|), \quad (|z| \leq 2M). \end{aligned}$$

This further implies

$$\begin{aligned} E(h_1) &= \frac{2}{n(n-1)} \sum_{i < i'} E\{\text{sign}(X_{i',1} - X_{i,1})\} = \frac{2}{n(n-1)} \sum_{i < i'} [F_p\{\beta_1(i' - i)/n\} - F_p\{-\beta_1(i' - i)/n\}] \\ 470 &\geq \frac{2D_4^2 M \beta}{n^2(n-1)} \sum_{i < i'} (i' - i) = \frac{D_4^2 M \beta}{3} \frac{n(n^2 - 1)}{n^2(n-1)} \geq \frac{2D_4^2 M \beta}{3}, \end{aligned}$$

where  $F_p(\cdot)$  is the distribution function of  $Z_{1,1} - Z_{2,1}$ . On the other hand, by the McDiarmid's inequality (McDiarmid, 1989), for any  $j \in \{1, \dots, d\}$ ,

$$\text{pr}\{|h_j - E(h_j)| > t\} \leq 2 \exp(-nt^2/2).$$

The rest is similar to the proof of Theorem 3 in the main paper.  $\square$

We then proceed to prove Theorem A8.

475 *Proof.* We focus on a simple Gaussian model where  $X_{1,\cdot}, \dots, X_{n,\cdot}$  are independent and normally distributed, with covariance matrix  $I_d$ . Accordingly, by virtue of the normal distribution, we can write  $(X_{1,j}, \dots, X_{n,j})^\top \sim N_n(\mu_{j,\cdot}, I_n)$  for  $j \in \{1, \dots, d\}$ . Here  $\mu_{j,\cdot} \in \mathcal{R}^n$  is the mean vector. We then consider the following simple alternative set of parameters:

$$\mathcal{H}(\beta) = \left\{ \mu = \{\mu_1, \dots, \mu_d\} : \mu_{i,\cdot} = \{0, \beta/n, 2\beta/n, \dots, (n-1)\beta/n\}^\top \text{ for some } i, \text{ the rests are all zero} \right\}.$$

Let  $\mu_\beta$  be the uniform measure on  $\mathcal{H}(\beta)$  and  $\beta = c_0''(\log d/n)^{1/2}$  for some small enough constant  $c_0'' < 3^{1/2}$ . Let  $\text{pr}_\mu$  be the probability measure on  $N_n(\mu_{1,\cdot}, I_n) \otimes \cdots \otimes N_n(\mu_{n,\cdot}, I_n)$ . In particular, let  $\text{pr}_0$  be the probability measure on  $N_n(0, I_n) \otimes \cdots \otimes N_n(0, I_n)$ . Let  $\text{pr}_{\mu_\beta} \equiv \int \text{pr}_\mu d\mu_\beta(\mu)$  be the measure based on  $\mathcal{H}(\beta)$ . Similar to the proof of Theorem 5, to prove Theorem A8, it suffices to show that

$$E_{\text{pr}_0}\{L_{\mu_\beta}^2(Y)\} = 1 + o(1),$$

where  $L_{\mu_\beta}(y) \equiv \text{dpr}_{\mu_\beta}(y)/\text{dpr}_0(y)$ . By construction, we can write

$$L_{\mu_\beta}(y) = \frac{1}{d} \sum_{\mu \in \mathcal{H}(\beta)} \left\{ \prod_{i=1}^d \exp\left(Z_{i,\cdot}^\top \mu_{i,\cdot} - \|\mu_{i,\cdot}\|_2^2/2\right) \right\}.$$

Accordingly, the above equation yields that

$$E_{\text{pr}_0}\{L_{\mu_\beta}^2(Y)\} = \frac{1}{d^2} \sum_{\mu^1, \mu^2 \in \mathcal{H}(\beta)} E\left\{ \prod_{i=1}^d \exp\left(Z_{i,\cdot}^\top \mu_{i,\cdot}^1 + Z_{i,\cdot}^\top \mu_{i,\cdot}^2 - \|\mu_{i,\cdot}^1\|_2^2/2 - \|\mu_{i,\cdot}^2\|_2^2/2\right) \right\},$$

where  $Z_{1,\cdot}, \dots, Z_{d,\cdot} \sim N_n(0, I_n)$  and  $\mu^k = \{\mu_{1,\cdot}^k, \dots, \mu_{d,\cdot}^k\}$  for  $k \in \{1, 2\}$ . We can then continue to write

$$\begin{aligned} E_{\text{pr}_0} L_{\mu_\beta}^2 &= \frac{1}{d^2} \sum_{\mu^1 \neq \mu^2} E \underbrace{\left\{ \prod_{i=1}^d \exp\left(Z_{i,\cdot}^\top \mu_{i,\cdot}^1 + Z_{i,\cdot}^\top \mu_{i,\cdot}^2 - \|\mu_{i,\cdot}^1\|_2^2/2 - \|\mu_{i,\cdot}^2\|_2^2/2\right) \right\}}_{H_1} + \\ &\quad \frac{1}{d^2} \sum_{\mu^1 = \mu^2} E \underbrace{\left\{ \prod_{i=1}^d \exp\left(Z_{i,\cdot}^\top \mu_{i,\cdot}^1 + Z_{i,\cdot}^\top \mu_{i,\cdot}^2 - \|\mu_{i,\cdot}^1\|_2^2/2 - \|\mu_{i,\cdot}^2\|_2^2/2\right) \right\}}_{H_2}. \end{aligned} \quad (\text{C20})$$

Let  $\mu^* \equiv \{0, \beta/n, \dots, (n-1)\beta/n\}^\top$ . For the first term in (C20), we have

$$H_1 = \frac{d-1}{d} E\{\exp(Z_{1,\cdot}^\top \mu^* - \|\mu^*\|_2^2/2)\} E\{\exp(Z_{2,\cdot}^\top \mu^* - \|\mu^*\|_2^2/2)\} = 1 + o(1).$$

For the second term in (C20), we have, when  $c_0'' \leq \sqrt{3}$ ,

$$\begin{aligned} H_2 &= d^{-1} E\{\exp(2Z_{1,\cdot}^\top \mu^* - \|\mu^*\|_2^2)\} = d^{-1} \exp(\|\mu^*\|_2^2) = d^{-1} \exp\{(1-n^{-1})(2n-1)\beta^2/6\} \\ &= d^{-1} \exp(n\beta^2/3)\{1 + o(1)\} = \exp\{-\log d + (c_0'')^2 \log d/3\}\{1 + o(1)\} = o(1). \end{aligned}$$

This completes the proof.  $\square$

### C.7. Proof of Theorem A1

*Proof.* We focus on simple linear rank statistics, as the extension to rank-type  $U$ -statistics is straightforward. Following the proof of Theorem 1 in the main paper and using Lemma C5, we can replace (C3) with

$$\text{pr}(A_{12}) = \text{pr}(|\psi_{12}| > t) = 2\{1 - \Phi(t)\}[1 + O\{(\log d)^{3/2}n^{-1/2} + (\log d)^{1/2}n^{-1/6}\}].$$

Furthermore, (C8) implies that

$$\begin{aligned} \lambda_n &= d^2\{1 - \Phi(t)\}[1 + O\{(\log d)^{3/2}n^{-1/2} + (\log d)^{1/2}n^{-1/6}\}][1 + O\{(\log d)^{-3/2}\}] \\ &= (8\pi)^{-1/2} \exp\left(-\frac{y}{2}\right)[1 + O\{(\log d)^{3/2}n^{-1/2} + (\log d)^{1/2}n^{-1/6} + (\log d)^{-3/2}\}]. \end{aligned}$$

Accordingly, we can separately bound the first and second terms in (C10), yielding that

$$|\text{pr}(L_n \leq t) - \exp(-\lambda_n)| = o(d^{-1})$$

and

$$|\exp(-\lambda_n) - \exp\{-\exp(-y/2)(8\pi)^{-1/2}\}| = O\{(\log d)^{3/2}n^{-1/2} + (\log d)^{1/2}n^{-1/6} + (\log d)^{-3/2}\}.$$

Here we use the fact that, when  $x$  approaches zero,  $\exp(x) - 1 \asymp x$ . This completes the proof.  $\square$

505

### C.8. Auxiliary lemmas

The following seven lemmas play crucial roles in our theory.

LEMMA C2 (ARRATIA ET AL. (1989)). *Let  $I$  be an index set and  $\{B_\alpha, \alpha \in I\}$  be a set of subsets of  $I$ ; that is,  $B_\alpha \subset I$  for each  $\alpha \in I$ . Let also  $\{\eta_\alpha, \alpha \in I\}$  be random variables. For a given  $t \in \mathcal{R}$ , set  $\lambda = \sum_{\alpha \in I} \text{pr}(\eta_\alpha > t)$ . Then*

$$|\text{pr}(\max_{\alpha \in I} \eta_\alpha \leq t) - e^{-\lambda}| \leq \min(1, \lambda^{-1})(b_1 + b_2 + b_3),$$

510 *where*

$$\begin{aligned} b_1 &\equiv \sum_{\alpha \in I} \sum_{\beta \in B_\alpha} \text{pr}(\eta_\alpha > t) \text{pr}(\eta_\beta > t), \quad b_2 \equiv \sum_{\alpha \in I} \sum_{\beta \neq \alpha, \beta \in B_\alpha} \text{pr}(\eta_\alpha > t, \eta_\beta > t), \\ b_3 &\equiv \sum_{\alpha \in I} E|\text{pr}\{\eta_\alpha > t \mid \sigma(\eta_\beta, \beta \notin B_\alpha)\} - \text{pr}(\eta_\alpha > t)|, \end{aligned}$$

where  $\sigma(\eta_\beta, \beta \notin B_\alpha)$  is the  $\sigma$ -algebra generated by  $\{\eta_\beta, \beta \notin B_\alpha\}$ . In particular, if  $\eta_\alpha$  is independent of  $\{\eta_\beta, \beta \notin B_\alpha\}$  for each  $\alpha$ , then  $b_3 = 0$ .

515

LEMMA C3. *Suppose that  $X, Y$  are two independent continuous random variables. Let  $X_1, \dots, X_n$  and  $Y_1, \dots, Y_n$  be independent observations of  $X$  and  $Y$ . Let  $\{Q_i^X, i = 1, \dots, n\}$  and  $\{Q_i^Y, i = 1, \dots, n\}$  be the rank of  $X_i$  and  $Y_i$  in the samples  $\{X_i\}_{i=1}^n$  and  $\{Y_i\}_{i=1}^n$ . Let  $\{R_{ni}\}_{i=1}^n$  represent the relative ranks:*

$$R_{ni} = Q_{i'}^Y \quad \text{subject to} \quad Q_{i'}^X = i.$$

We then have  $\{R_{n1}, \dots, R_{nn}\}$  are uniformly distributed in all permutations of  $\{1, \dots, n\}$  with

520

$$\text{pr}(R_{n1} = i_1, \dots, R_{nn} = i_n) = \frac{1}{n!}, \quad (\text{C21})$$

for any permutation  $\{i_1, \dots, i_n\}$  of  $\{1, \dots, n\}$ . Here  $n!$  represents the factorial of  $n$ .

*Proof.* Using the fact that  $\{X_i\}_{i=1}^n$  are independent of  $\{Y_i\}_{i=1}^n$ , for any permutation  $\{i_1, \dots, i_n\}$  of  $\{1, \dots, n\}$  and any  $a_1, \dots, a_n \in \mathcal{R}$ , we have

$$\text{pr}(X_{i_1} < X_{i_2} < \dots < X_{i_n} \mid Y_1 = a_1, \dots, Y_n = a_n) = \text{pr}(X_{i_1} < X_{i_2} < \dots < X_{i_n}).$$

525

Therefore, the relative ranks' joint distribution is identical to the distribution of  $\{Q_i^X, i = 1, \dots, n\}$ . The latter's distribution is known to be jointly distributed in the form of (C21).  $\square$

LEMMA C4. *Let  $\{S_{jk}, 1 \leq j < k \leq d\}$  be functions of relative ranks  $\{R_{ni}^{jk}, i = 1, \dots, n\}$  with the same mapping function from  $\{R_{ni}^{jk}, i = 1, \dots, n\}$  for any  $j, k$ . Then, under the null hypothesis  $H_0$ ,  $S_{u_1j}$  is identically and pairwise independently distributed to  $S_{u_2k}$  for any non-identical  $(u_1, j)$  and  $(u_2, k)$ .*

530

*Proof.* Using Lemma C3, the distribution of the relative ranks does not change as long as the independence assumption holds. We then have  $\{S_{jk}, 1 \leq j < k \leq d\}$  are all identically distributed. It is obvious that, under  $H_0$ ,  $S_{u_1j}, S_{u_2k}$  are independent when there is no overlap between  $(u_1, j)$  and  $(u_2, k)$ . In the rest we show that  $S_{u_1j}, S_{u_2k}$  are independent when there is one overlap between  $(u_1, j)$  and  $(u_2, k)$ .

535

We consider the case  $u_1 = u_2 \neq j \neq k$  and the proofs of all the other settings are similar. We prove  $S_{uj}$  is independent of  $S_{uk}$  with  $u = u_1 = u_2 \in \{1, \dots, d\}$ . It is sufficient to show that for any two bounded and measurable functions  $g(x)$  and  $h(x)$ , we have

$$E\{g(S_{uj})h(S_{uk})\} = E\{g(S_{uj})\}E\{h(S_{uk})\}.$$

Given  $\{X_{1,u}, X_{2,u}, \dots, X_{n,u}\}$ ,  $S_{uj}$  and  $S_{uk}$  are independent. We have

$$\begin{aligned} E\{g(S_{uj})h(S_{uk})\} &= E(E[g(S_{uj})h(S_{uk}) \mid \{X_{1,u}, X_{2,u}, \dots, X_{n,u}\}]) \\ &= E(E[g(S_{uj}) \mid \{X_{1,u}, X_{2,u}, \dots, X_{n,u}\}]E[h(S_{uk}) \mid \{X_{1,u}, X_{2,u}, \dots, X_{n,u}\}]). \end{aligned}$$

Next we show that, given  $\{X_{1,u}, X_{2,u}, \dots, X_{n,u}\}$ , the conditional distributions of  $S_{uj}$  and  $g(S_{uj})$  are irrelevant to  $\{X_{1,u}, X_{2,u}, \dots, X_{n,u}\}$ . This follows by applying Lemma C3. A detailed proof can be found in Pages 477–479 in Kendall & Stuart (1961). Using this argument, we then have

$$E[g(S_{uj}) \mid \{X_{1,u}, X_{2,u}, \dots, X_{n,u}\}] = E[g(S_{uj}) \mid \{X'_{1,u}, X'_{2,u}, \dots, X'_{n,u}\}],$$

for any sequence  $\{X'_{1,u}, X'_{2,u}, \dots, X'_{n,u}\}$  randomly drawn from  $X_u$ . This implies

$$E[g(S_{uj}) \mid \{X_{1,u}, X_{2,u}, \dots, X_{n,u}\}] = E\{g(S_{uj})\}.$$

Similarly, we have

$$E[g(S_{uk}) \mid \{X_{1,u}, X_{2,u}, \dots, X_{n,u}\}] = E\{g(S_{uk})\}.$$

This shows that  $\{S_{jk}, 1 \leq j < k \leq d\}$  are pairwise independent.  $\square$

LEMMA C5. Suppose that the boundedness assumption in Theorem 2 hold. We then have, in a region  $x \in (0, o(n^{1/6}))$ ,

$$\text{pr} \left[ \frac{U_{jk} - E(U_{jk})}{\{\text{var}(U_{jk})\}^{1/2}} > x \right] = \{1 - \Phi(x)\} \left\{ 1 + O\left(\frac{1+x^3}{n^{1/2}}\right) \right\}. \quad (\text{C22})$$

Suppose that the regularity conditions in Theorem 1 hold. Under the null hypothesis  $H_0$  holds, we have in the region  $x \in (0, O(n^{1/6-\epsilon}))$  for some  $\epsilon > 0$ ,

$$\text{pr} \left[ \frac{V_{jk} - E_{H_0}(V_{jk})}{\{\text{var}_{H_0}(V_{jk})\}^{1/2}} > x \right] = \{1 - \Phi(x)\} \left\{ 1 + O\left(\frac{1+x^3}{n^{1/2}} + \frac{x}{n^{1/6}}\right) \right\}. \quad (\text{C23})$$

And we can replace the rate in the right-hand side of (C23) with  $1 + o(1)$  when we have  $x \in (0, o(n^{1/6}))$ .

*Proof.* For the moderate deviation properties of the  $U$ -statistics, the general results for them of unbounded kernel functions can be found in Malevich & Abdalimov (1979) and Vandemaële (1983). Borovskikh & Weber (2003) give the result for  $U$ -statistics of bounded kernels with symmetric kernels. However, using a similar argument as in Eichelsbacher (1998) and Hoeffding (1948), the results can be generalized to the multivariate data and asymmetric kernel cases.

When we do not specify the rate of convergence on the right hand side of (C23), the proof of the moderate deviation for simple linear rank statistics is in Kallenberg (1982). For explicitly characterizing the rate, we simply follow Kallenberg (1982). Below we adopt some notation used in Kallenberg (1982). Consider the data with  $n$  independent samples  $X_1, \dots, X_n$  drawn from  $X \in \mathcal{R}$ . Let  $F(\cdot)$  be the distribution function of  $X$ . Let  $R_{n1}, \dots, R_{nn}$  be the ranks of  $X_1, \dots, X_n$ . Let  $S_n = \sum_{i=1}^n c_{ni}g\{R_{ni}/(n+1)\}$  be the simple linear rank statistic of interest and  $V_n = \sum_{i=1}^n c_{ni}g\{F(X_i)\}$  be an intermediate one. It is obvious that  $S_n$  is identically distributed to  $V_{jk}$  under the null hypothesis.

Let  $\mu_n$  and  $\tau_n$  be the mean and standard deviation of  $S_n$ . Without loss of generality, we assume  $\mu_n = 0$ . Equations (2.1) and (2.2) in Kallenberg (1982) imply

$$\begin{aligned} \text{pr}(S_n > x\tau_n) &\geq \text{pr}\{V_n > (x + n^{-1/6}\tau_n)\} - \text{pr}(|S_n - V_n| > n^{-1/6}\tau_n) \\ \text{and } \text{pr}(S_n > x\tau_n) &\leq \text{pr}\{V_n > (x - n^{-1/6}\tau_n)\} + \text{pr}(|S_n - V_n| > n^{-1/6}\tau_n). \end{aligned} \quad (\text{C24})$$

On one hand, using the lemma in Page 406 in Kallenberg (1982), we have

$$\begin{aligned} \text{pr}(|S_n - V_n| > n^{-1/6}\tau_n)\{1 - \Phi(x)\}^{-1} &\leq (1/2)^{\delta n^{1/3}} \{1 - \Phi(n^{1/6-\epsilon})\}^{-1} \\ &\leq \exp\{-\delta n^{1/3}\} \log 2 + n^{1/3-2\epsilon}/2\} O(n^{1/6-\epsilon}). \end{aligned} \quad (\text{C25})$$

On the other hand,  $V_n$  is the sum of independent bounded random variables. Therefore, we can use the classic result on the moderate deviation of sums of independence variables (check, for example, Chapter 8 in Petrov (1975)). It implies that for any  $y_n$ ,

$$\text{pr}(V_n > y_n \tau_n) = \{1 - \Phi(y_n)\} \left\{1 + O\left(\frac{1 + y_n^3}{n^{1/2}}\right)\right\}. \quad (\text{C26})$$

575 We let  $|y_n - x| \leq n^{-1/6}$ , which implies that  $1 + y_n^3 \asymp 1 + x^3$ . Then, standard arguments on Gaussian tail probabilities give us

$$\{1 - \Phi(y_n)\} / \{1 - \Phi(x)\} = 1 + O(n^{-1/6}x). \quad (\text{C27})$$

Plugging (C25), (C26), and (C27) into (C24), we have

$$\text{pr}(S_n > x \tau_n) = \{1 - \Phi(x)\} \left\{1 + O\left(\frac{1 + y_n^3}{n^{1/2}} + \frac{x}{n^{1/6}}\right)\right\}.$$

This completes the proof.  $\square$

580 **LEMMA C6 (CONCENTRATION INEQUALITY FOR SIMPLE LINEAR RANK STATISTICS).** *Assume the setting and notation in Lemma 3. Consider the simple linear rank statistic*

$$V \equiv \sum_{i=1}^n c_{ni} g\left(\frac{R_{ni}}{n+1}\right) = \frac{1}{n} \sum_{i=1}^n f\left(\frac{Q_i^X}{n+1}\right) g\left(\frac{Q_i^Y}{n+1}\right),$$

where  $f(\cdot)$  and  $g(\cdot)$  are Lipschitz functions with Lipschitz constant  $\Delta < \infty$  and  $\max\{|f(0)|, |g(0)|\} \leq A_2$ . We have, for any  $t > 0$ ,

$$\text{pr}(|V - EV| > t) \leq 2 \exp(-Cnt^2),$$

for some scalar  $C$  only depending on  $\Delta$  and  $A_2$ .

585 *Proof.* The proof is an application of the McDiarmid's inequality (McDiarmid, 1989). In the samples  $\{(X_i, Y_i), i = 1, \dots, n\}$ , consider replacing  $(X_1, Y_1)$  with  $(X'_1, Y'_1)$  and fix all the others. Then the ranks of  $\{Q_i^X, i = 1, \dots, n\}$  and  $\{Q_i^Y, i = 1, \dots, n\}$  are changed to  $\{\tilde{Q}_i^X, i = 1, \dots, n\}$  and  $\{\tilde{Q}_i^Y, i = 1, \dots, n\}$ . By the alignment assumption, we have

$$\left| \sum_{i=1}^n c_{ni} g\left(\frac{R_{ni}}{n+1}\right) - \sum_{i=1}^n c_{ni} g\left(\frac{\tilde{R}_{ni}}{n+1}\right) \right| = \frac{1}{n} \left| \sum_{i=1}^n f\left(\frac{Q_i^X}{n+1}\right) g\left(\frac{Q_i^Y}{n+1}\right) - \sum_{i=1}^n f\left(\frac{\tilde{Q}_i^X}{n+1}\right) g\left(\frac{\tilde{Q}_i^Y}{n+1}\right) \right|.$$

Because  $\max_{1 \leq i \leq n} |f\{i/(n+1)\}| \leq A_2 + \Delta$  and  $\max_{1 \leq i \leq n} |g\{i/(n+1)\}| \leq A_2 + \Delta$ , it yields

$$\begin{aligned} & \frac{1}{n} \left| \sum_{i=1}^n f\left(\frac{Q_i^X}{n+1}\right) g\left(\frac{Q_i^Y}{n+1}\right) - \sum_{i=1}^n f\left(\frac{\tilde{Q}_i^X}{n+1}\right) g\left(\frac{\tilde{Q}_i^Y}{n+1}\right) \right| \\ & \leq \frac{A_2 + \Delta}{n} \left\{ \sum_{i=1}^n \left| f\left(\frac{Q_i^X}{n+1}\right) - f\left(\frac{\tilde{Q}_i^X}{n+1}\right) \right| + \sum_{i=1}^n \left| g\left(\frac{Q_i^Y}{n+1}\right) - g\left(\frac{\tilde{Q}_i^Y}{n+1}\right) \right| \right\}. \end{aligned} \quad 590$$

Here the inequality follows from the fact that for any two sequences  $\{(x_1^1, y_1^1), \dots, (x_n^1, y_n^1)\}$  and  $\{(x_1^2, y_1^2), \dots, (x_n^2, y_n^2)\}$ ,

$$\begin{aligned} & \left| \sum_{i=1}^n x_i^1 y_i^1 - \sum_{i=1}^n x_i^2 y_i^2 \right| \leq \sum_{i=1}^n |x_i^1 (y_i^1 - y_i^2)| + \sum_{i=1}^n |y_i^2 (x_i^1 - x_i^2)| \\ & \leq \max_{1 \leq i \leq n} |x_i^1| \sum_{i=1}^n |y_i^1 - y_i^2| + \max_{1 \leq i \leq n} |y_i^2| \sum_{i=1}^n |x_i^1 - x_i^2|. \end{aligned} \quad 595$$

Using the fact that both  $f(\cdot)$  and  $g(\cdot)$  are Lipschitz, we can further write

$$\begin{aligned} & \frac{A_2 + \Delta}{n} \left\{ \sum_{i=1}^n \left| f\left(\frac{Q_i^X}{n+1}\right) - f\left(\frac{\tilde{Q}_i^X}{n+1}\right) \right| + \sum_{i=1}^n \left| g\left(\frac{Q_i^Y}{n+1}\right) - g\left(\frac{\tilde{Q}_i^Y}{n+1}\right) \right| \right\} \\ & \leq \frac{\Delta(A_2 + \Delta)}{n(n+1)} \left( \sum_{i=1}^n |Q_i^X - \tilde{Q}_i^X| + \sum_{i=1}^n |Q_i^Y - \tilde{Q}_i^Y| \right). \end{aligned}$$

Because only one position in  $\{X_1, \dots, X_n\}$  and  $\{Y_1, \dots, Y_n\}$  is changing, we have

$$\sum_{i=1}^n |Q_i^X - \tilde{Q}_i^X| \leq 2(n-1) \quad \text{and} \quad \sum_{i=1}^n |Q_i^Y - \tilde{Q}_i^Y| \leq 2(n-1).$$

This further implies that

$$\left| \sum_{i=1}^n c_{ni} g\left(\frac{R_{ni}}{n+1}\right) - \sum_{i=1}^n c_{ni} g\left(\frac{\tilde{R}_{ni}}{n+1}\right) \right| \leq \frac{4(A_2 + \Delta)\Delta(n-1)}{n(n+1)} \asymp \frac{1}{n}.$$

Then, by using the McDiarmid's inequality, we have the desired concentration inequality.  $\square$

LEMMA C7 (CONCENTRATION INEQUALITY FOR  $U$ -STATISTICS). *Suppose that  $U$  is a  $U$ -statistic with degree  $m$  and bounded kernel  $|h(\cdot)| \leq M$ . We then have, for any  $t > 0$ ,*

$$\text{pr}(|U - EU| > t) \leq 2 \exp\{-nt^2/(2mM^2)\}.$$

*Proof.* This concentration inequality follows from calculating the moment generating function of the  $U$ -statistics and using the Hoeffding's decoupling trick. Check Hoeffding (1963) for the detailed proof.  $\square$

LEMMA C8. *Under the Gaussian model with the Pearson's correlation matrix  $R$ , we have the following four equations hold:*

$$\begin{aligned} E(\rho_{jk}) &= \frac{6}{\pi} \arcsin(R_{jk}/2) + O(1/n), \quad E(\tau_{jk}) = \frac{2}{\pi} \arcsin(R_{jk}), \\ E(\hat{\rho}_{jk}) &= \frac{6}{\pi} \arcsin(R_{jk}/2) + O(1/n), \quad \text{and} \quad E(\hat{\tau}_{jk}) = \frac{4}{\pi} \arcsin(R_{jk}/2) + O(1/n). \end{aligned}$$

*Proof.* The relationship between Spearman's rho, Kendall's tau, and Pearson's correlation coefficients under the Gaussian model can be found in Kruskal (1958). Noticing that  $\hat{\rho}_{jk}$  and  $\hat{\tau}_{jk}$  are asymptotically equivalent to  $\rho_{jk}$  and  $2\rho_{jk}/3$ , we have the other two equations.  $\square$

## REFERENCES

- ARCONES, M. A. & GINE, E. (1993). Limit theorems for U-processes. *The Annals of Probability* **21**, 1494–1542.
- ARRATIA, R., GOLDSTEIN, L. & GORDON, L. (1989). Two moments suffice for Poisson approximations: the Chen-Stein method. *The Annals of Probability* **17**, 9–25.
- BAI, Z. & SARANADASA, H. (1996). Effect of high dimension: by an example of a two sample problem. *Statistica Sinica* **6**, 311–329.
- BOROVSKIKH, Y. V. & WEBER, N. C. (2003). Large deviations of U-statistics. I. *Lithuanian Mathematical Journal* **43**, 11–33.
- CAI, T. & JIANG, T. (2011). Limiting laws of coherence of random matrices with applications to testing covariance structure and construction of compressed sensing matrices. *The Annals of Statistics* **39**, 1496–1525.
- CAI, T., LIU, W. & XIA, Y. (2014). Two-sample test of high dimensional means under dependence. *Journal of the Royal Statistical Society: Series B (Statistical Methodology)* **76**, 349–372.
- CHEN, S. & QIN, Y.-L. (2010). A two-sample test for high-dimensional data with applications to gene-set testing. *The Annals of Statistics* **38**, 808–835.
- CHEN, S., ZHANG, L. & ZHONG, P. (2010). Tests for high-dimensional covariance matrices. *Journal of the American Statistical Association* **105**, 810–819.
- DVORETZKY, A., KIEFER, J. C. & WOLFOWITZ, J. (1956). Asymptotic minimax character of the sample distribution function and of the classical multinomial estimator. *The Annals of Mathematical Statistics* **27**, 642–669.

- EICHELSBACHER, P. (1998). Moderate and large deviations for U-processes. *Stochastic Processes and Their Applications* **74**, 273–296.
- HÁJEK, J., SIDAK, Z. & SEN, P. K. (1999). *Theory of Rank Tests (2nd edition)*. New York: Academic Press.
- 635 HOEFFDING, W. (1948). A class of statistics with asymptotically normal distribution. *The Annals of Mathematical Statistics* **19**, 293–325.
- HOEFFDING, W. (1963). Probability inequalities for sums of bounded random variables. *Journal of the American Statistical Association* **58**, 13–30.
- KALLENBERG, W. C. M. (1982). Cramér type large deviations for simple linear rank statistics. *Zeitschrift für Wahrscheinlichkeitstheorie und Verwandte Gebiete* **60**, 403–409.
- 640 KENDALL, M. G. & STUART, A. (1961). *The Advanced Theory of Statistics. Vols. II*. London: Griffin.
- KRUSKAL, W. H. (1958). Ordinal measures of association. *Journal of the American Statistical Association* **53**, 814–861.
- LEUNG, D. & DRTON, M. (2017). Testing independence in high dimensions with sums of squares of rank correlations. *The Annals of Statistics*, online version.
- 645 LIU, W., LIN, Z. & SHAO, Q. (2008). The asymptotic distribution and Berry–Esseen bound of a new test for independence in high dimension with an application to stochastic optimization. *The Annals of Applied Probability* **18**, 2337–2366.
- MALEVICH, T. & ABDALIMOV, B. (1979). Large deviation probabilities for U-statistics. *Theory of Probability and Its Applications* **24**, 215–219.
- 650 MANN, H. B. (1945). Nonparametric tests against trend. *Econometrica* **13**, 245–259.
- MAO, G. (2014). A new test of independence for high-dimensional data. *Statistics and Probability Letters* **93**, 14–18.
- MAO, G. (2016). Robust test for independence in high dimensions. *Communications in Statistics - Theory and Methods*, online version.
- MASSART, P. (1990). The tight constant in the Dvoretzky–Kiefer–Wolfowitz inequality. *The Annals of Probability* **18**, 1269–1283.
- 655 MCDIARMID, C. J. H. (1989). On the method of bounded differences. *Surveys in Combinatorics* **141**, 148–188.
- NADARAJAH, S. & KOTZ, S. (2008). Exact distribution of the max/min of two Gaussian random variables. *IEEE Transactions on Very Large Scale Integration (VLSI) Systems* **16**, 210–212.
- NELSEN, R. B. (1999). *An Introduction to Copulas*. New York: Springer.
- 660 PETROV, V. V. (1975). *Sums of Independent Random Variables*. New York: Springer.
- PÓCZOS, B., GHAHRAMANI, Z. & SCHNEIDER, J. (2012). Copula-based kernel dependency measures. In *Proceedings of the 29th International Conference on Machine Learning (ICML-12)*, J. Langford & J. Pineau, eds., ICML '12. New York, NY, USA: Omnipress.
- RACHEV, S. (2003). *Handbook of Heavy Tailed Distributions in Finance*. North Holland: Elsevier.
- 665 REDDI, S. J. & PÓCZOS, B. (2013). Scale invariant conditional dependence measures. In *Proceedings of the 30th International Conference on Machine Learning (ICML-13)*, S. Dasgupta & D. Mcallester, eds., vol. 28. JMLR Workshop and Conference Proceedings.
- SERFLING, R. J. (2002). *Approximation Theorems of Mathematical Statistics*, vol. 162. New York: Wiley.
- SHAO, Q. & ZHOU, W.-X. (2014). Necessary and sufficient conditions for the asymptotic distributions of coherence of ultra-high dimensional random matrices. *The Annals of Probability* **42**, 623–648.
- 670 SRIVASTAVA, M. S. & DU, M. (2008). A test for the mean vector with fewer observations than the dimension. *Journal of Multivariate Analysis* **99**, 386–402.
- VANDEMAELE, M. (1983). On large deviation probabilities for U-statistics. *Theory of Probability and Its Applications* **27**, 614–614.
- 675 XUE, L., MA, S. & ZOU, H. (2012). Positive-definite  $\ell_1$ -penalized estimation of large covariance matrices. *Journal of the American Statistical Association* **107**, 1480–1491.
- ZAITSEV, A. Y. (1987). On the Gaussian approximation of convolutions under multidimensional analogues of S.N. Bernstein's inequality conditions. *Probability Theory and Related Fields* **74**, 535–566.
- ZHOU, W. (2007). Asymptotic distribution of the largest off-diagonal entry of correlation matrices. *Transactions of the American Mathematical Society* **359**, 5345–5363.
- 680

[Received M Y. Revised M Y]
